# Supplementary material for: Issues with the Specificity of Immunological Reagents for NLRP3: Implications for Age-related Macular Degeneration
Source: PubMed Central journal article supplement (PMC5764999; doi:10.1038/s41598-017-17634-1), 2018-01-11
Supplement: 41598_2017_17634_MOESM1_ESM.pdf [file 41598_2017_17634_MOESM1_ESM.pdf]

# Supplementary Information

## **Issues with the Specificity of Immunological Reagents for NLRP3: Implications for AMD Research.**

Cassandra Kosmidou<sup>1</sup>, Nikolaos E. Efstathiou<sup>1</sup>, Mien V. Hoang<sup>1</sup>, Shoji Notomi<sup>1</sup>, Eleni K. Konstantinou<sup>1</sup>, Masayuki Hirano<sup>2</sup>, Kosuke Takahashi<sup>2</sup>, Daniel E. Maidana<sup>1</sup>, Pavlina Tsoka<sup>1</sup>, Lucy Young<sup>1</sup>, Evangelos S. Gragoudas<sup>1</sup>, Timothy W. Olsen<sup>3</sup>, Yuki Morizane<sup>2</sup>, Joan W. Miller<sup>1</sup> and Demetrios G. Vavvas<sup>1\*</sup>

<sup>1</sup>Department of Ophthalmology, Retina Service, Massachusetts Eye and Ear Infirmary, Harvard Medical School, Boston, Massachusetts 02114, USA

<sup>2</sup>Department of Ophthalmology, Okayama University Graduate School of Medicine, Okayama 700-8558, Japan

<sup>3</sup>Department of Ophthalmology, Mayo Clinic, 200 First Street SW, Rochester, MN, 55905, USA

## Supplementary Figure S1: NLRP3 Immunoprecipitation validation in THP-1 lysates

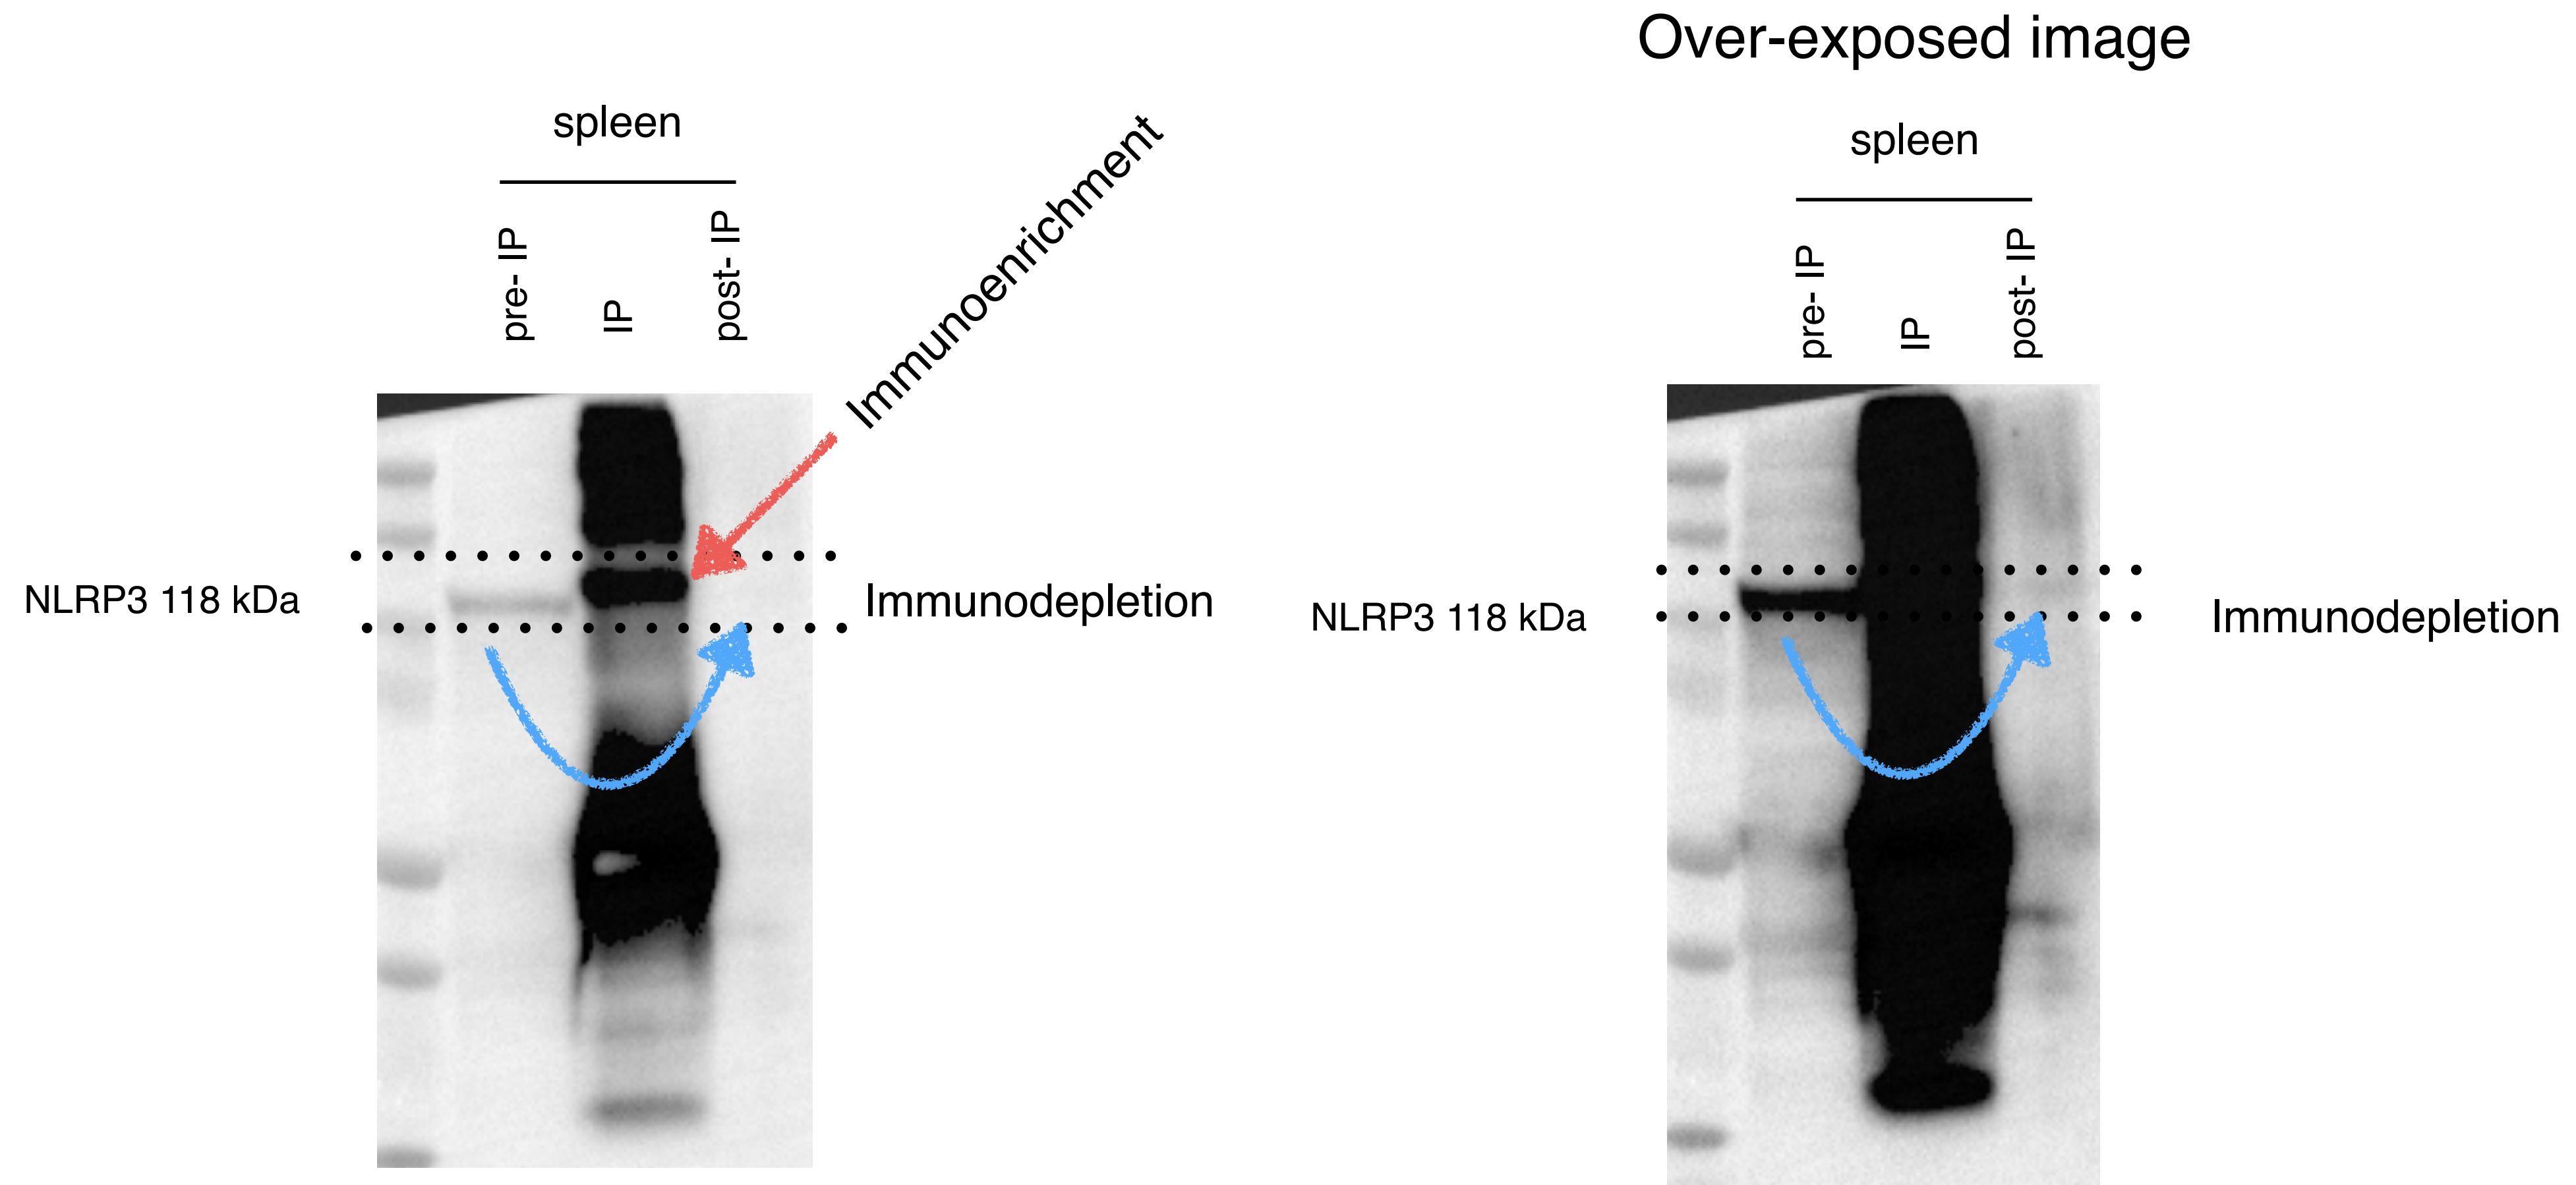

**Supplementary Fig. S1:** Evidence illustrating that the anti-NLRP3 antibody (CST, D4D8T) can efficiently immunoprecipitate (IP) NLRP3 from positive control THP-1 cells. Western blotting analysis shows a clear band in the pre-IP protein lysate, an enhanced band in the immunoprecipitated (IP) sample (immune-enrichment) and absence of an NLRP3 band in the post-IP protein lysate supernatant, indicating that the sample became depleted of NLRP3 (immune-depletion) and was picked up by the agarose A/G beads—anti-NLRP3 antibody conjugate and collected in the precipitate.

# Supplementary Figure S2: Coomassie Blue staining

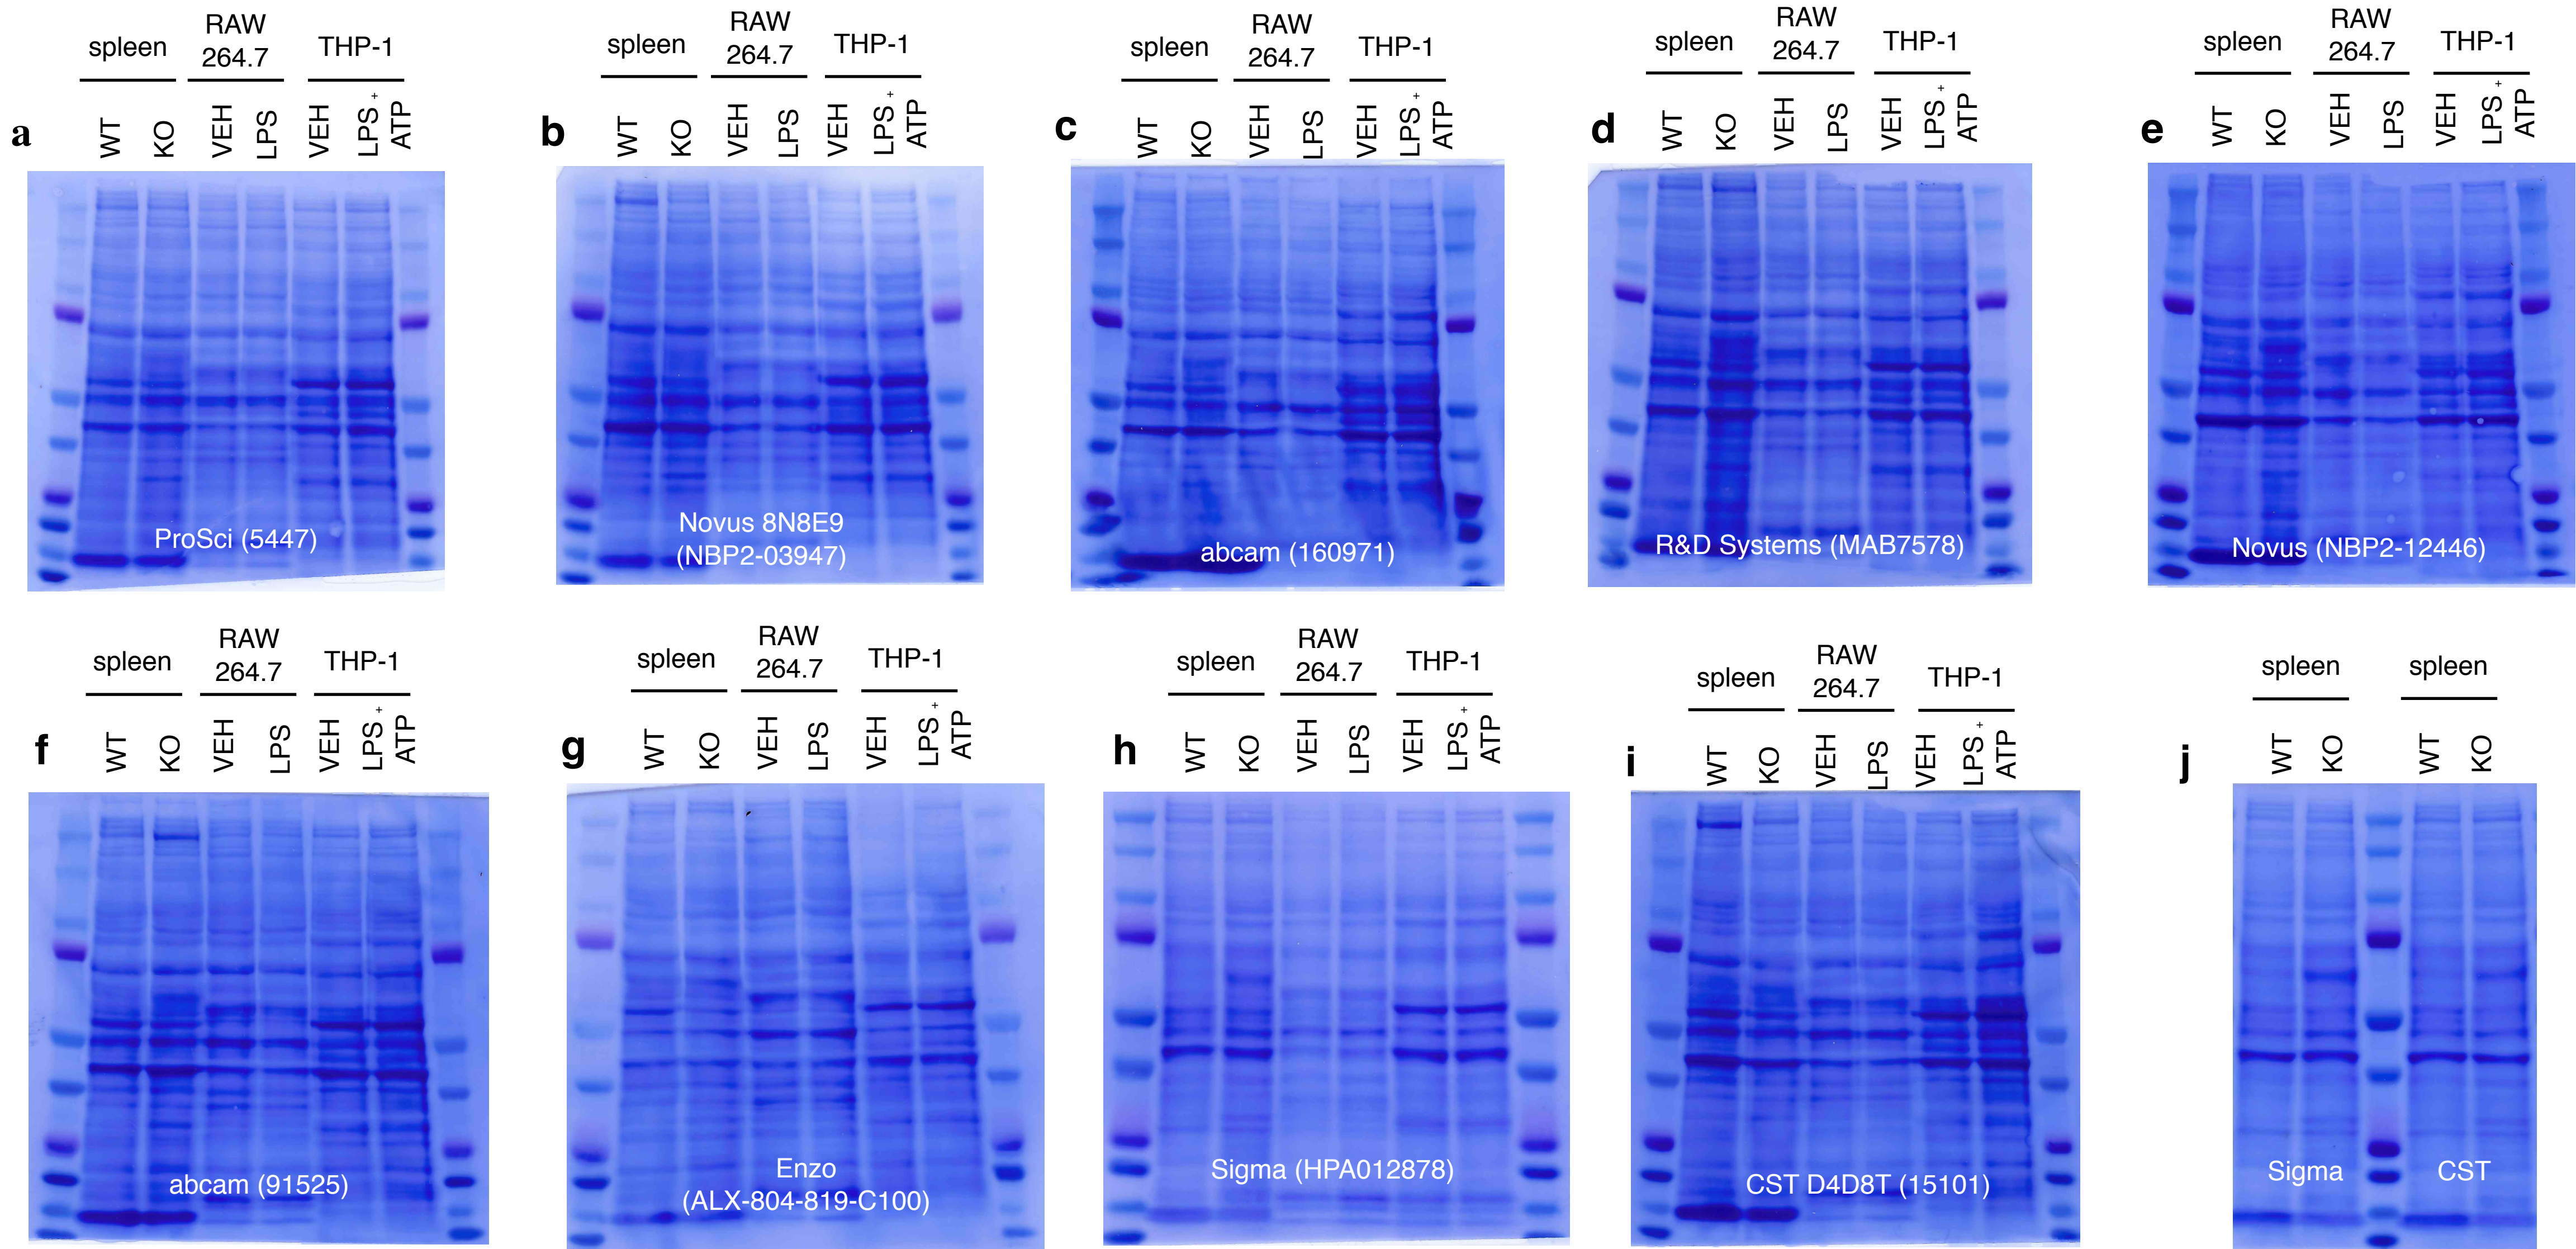

**Supplementary Fig. S2:** Coomassie Blue staining of the same blots presented in Figures 1a-j, to determine equal protein loading between samples on the same blot.

# Supplementary Figure S3: Coomassie Blue staining

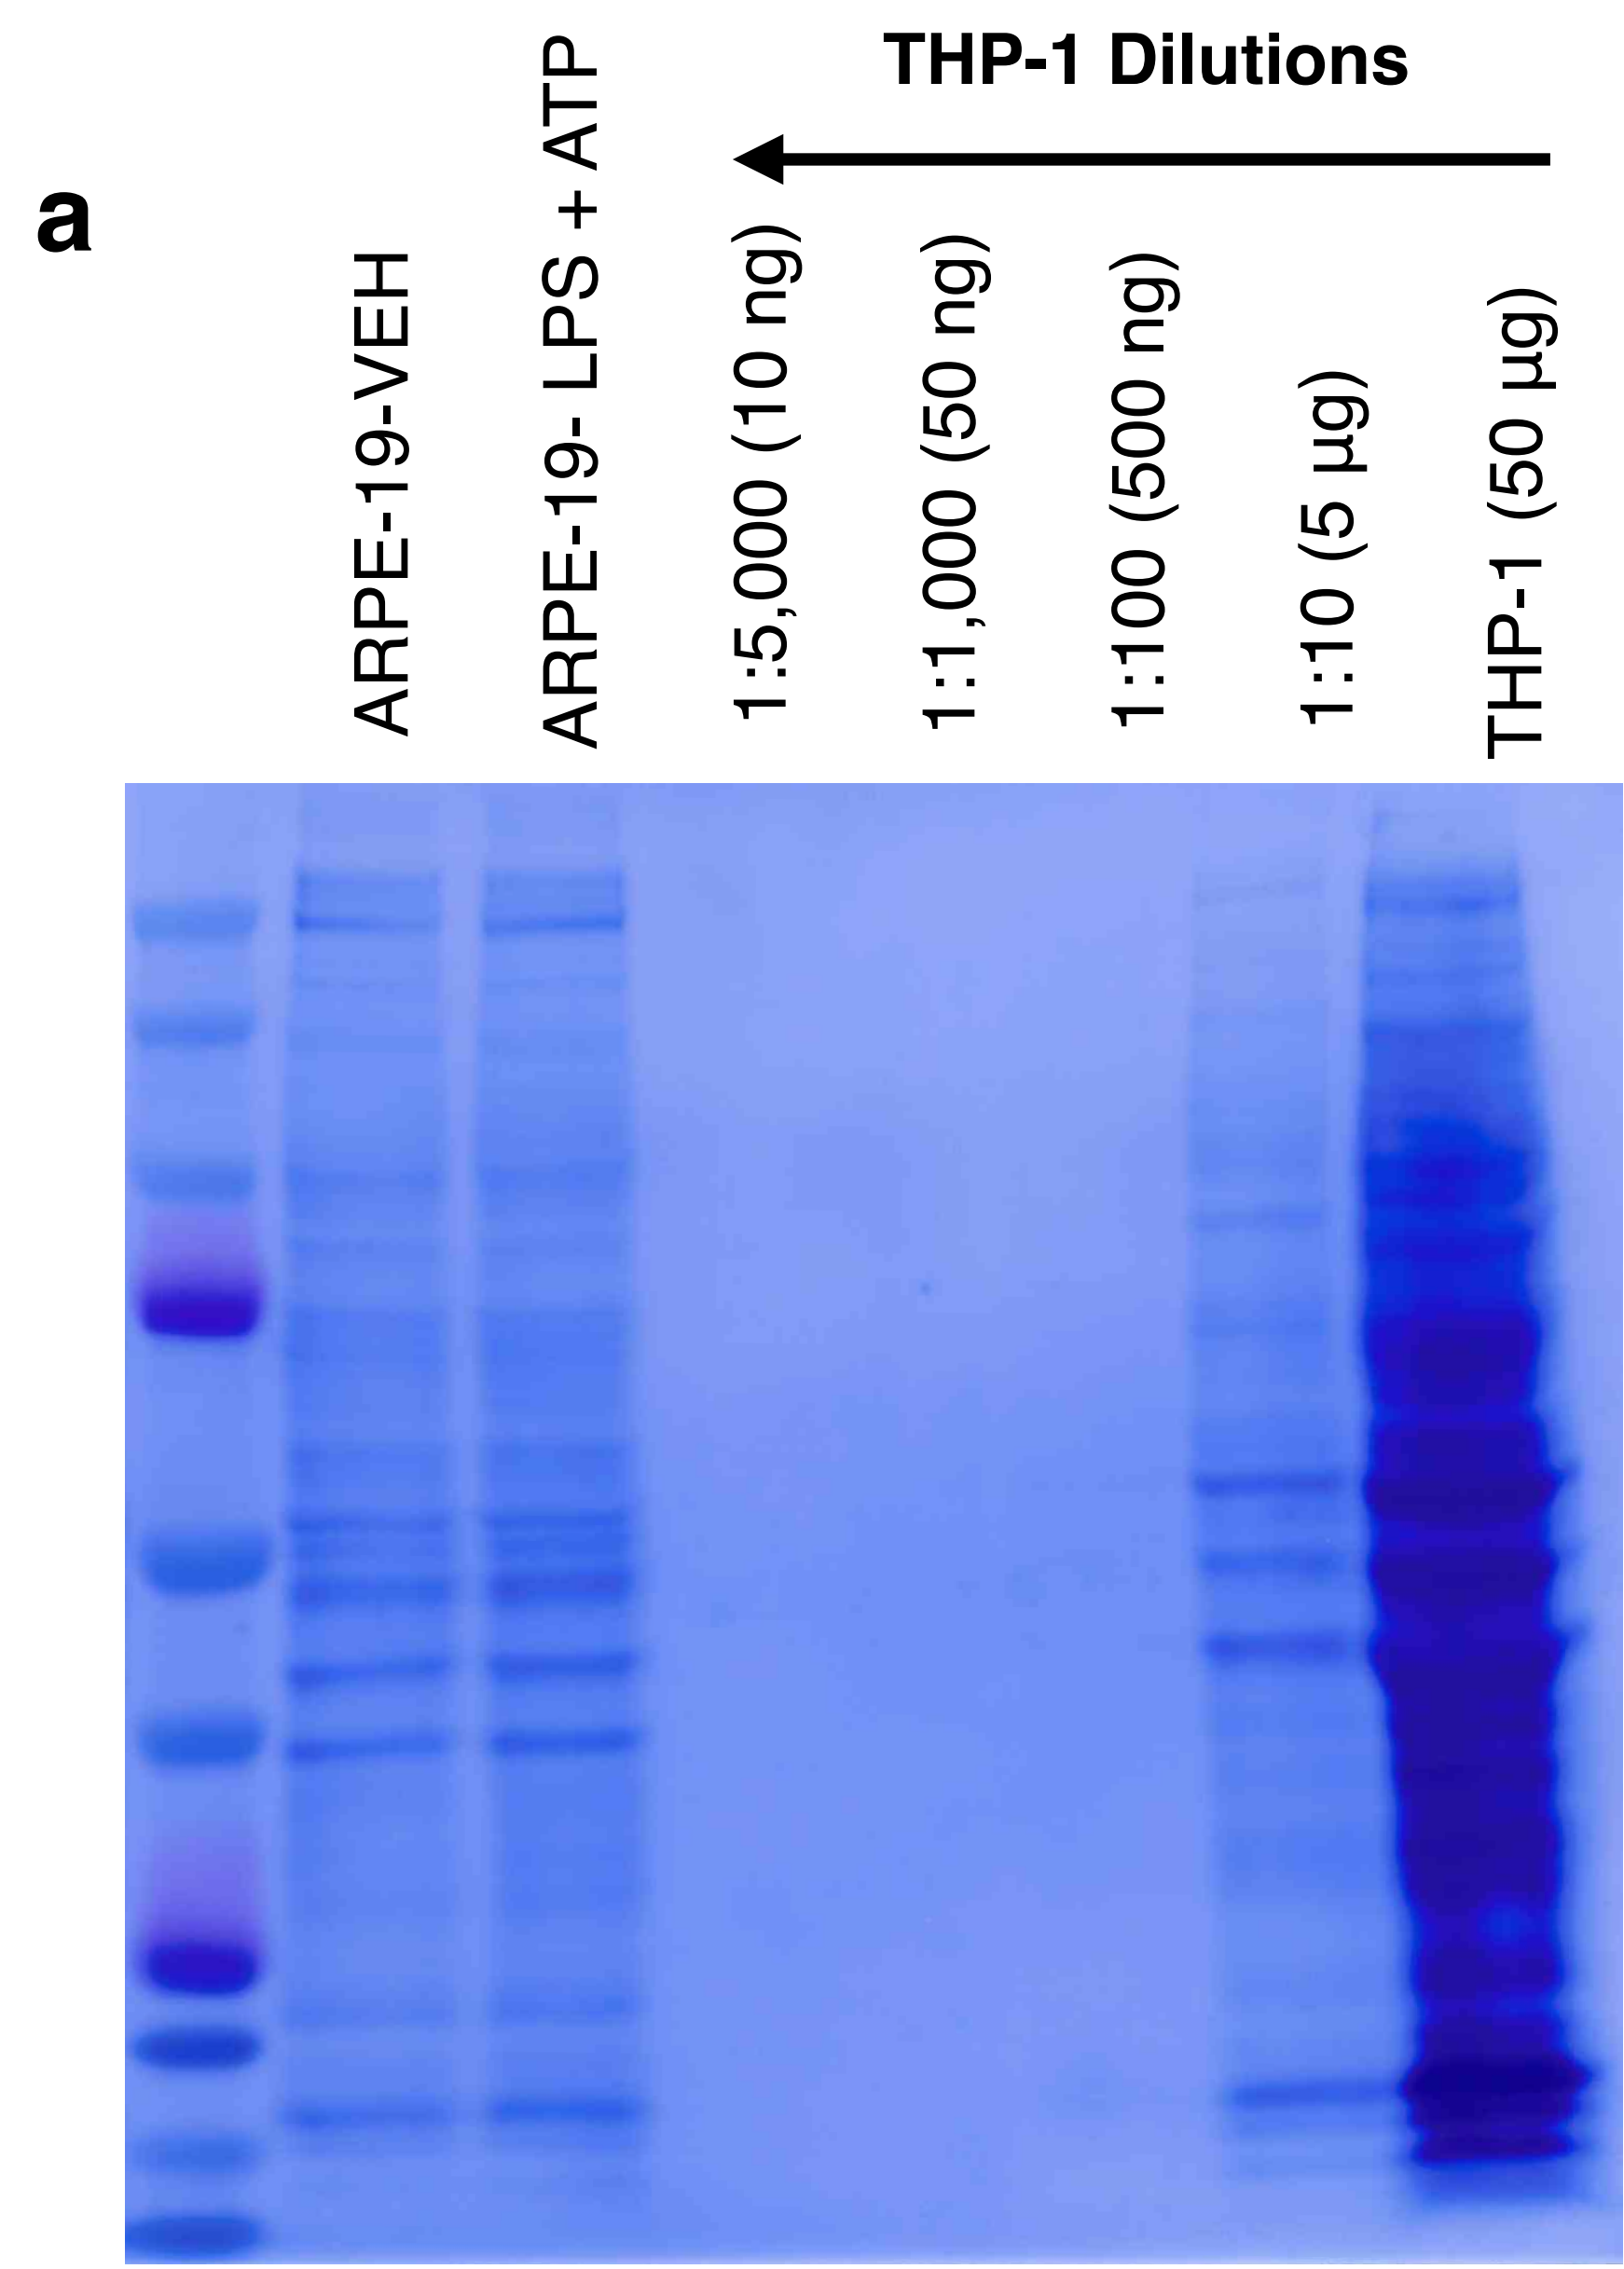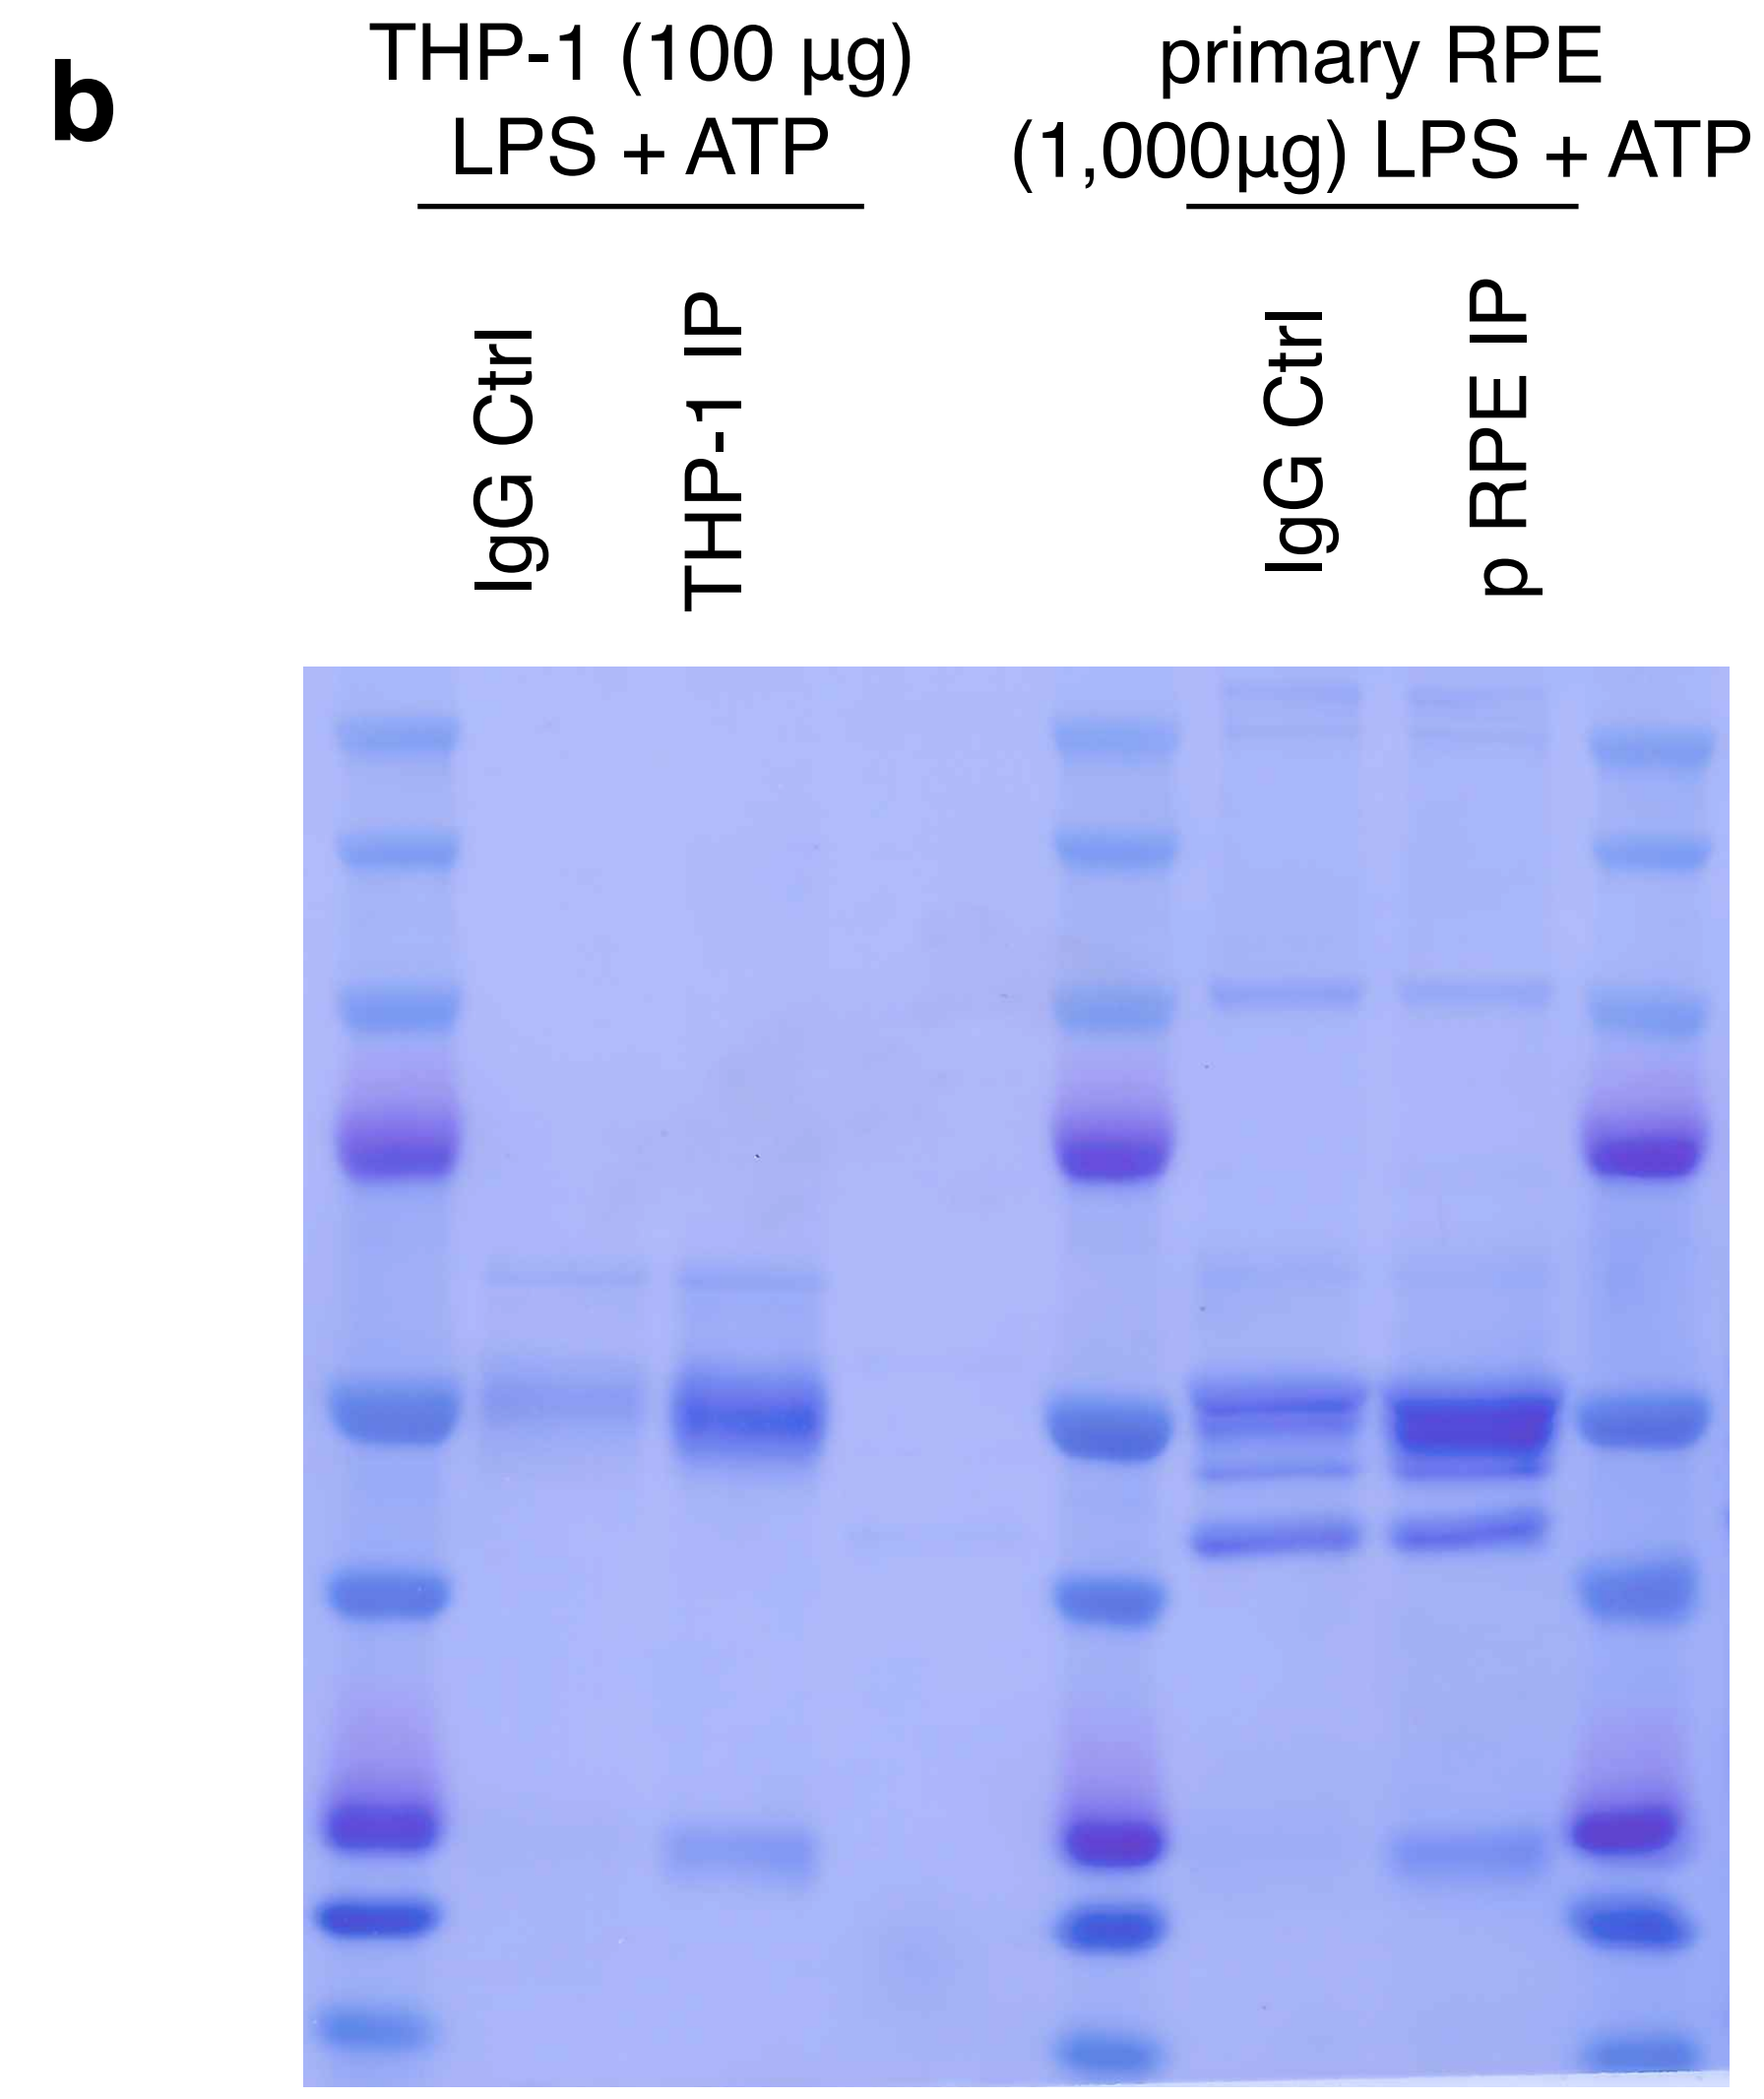

Supplementary Figure S3: Coomassie Blue staining of the same blots presented in Figures 2a, b, to determine equal protein loading between samples on the same blot.

# Supplementary Figure S4: Coomassie Blue staining

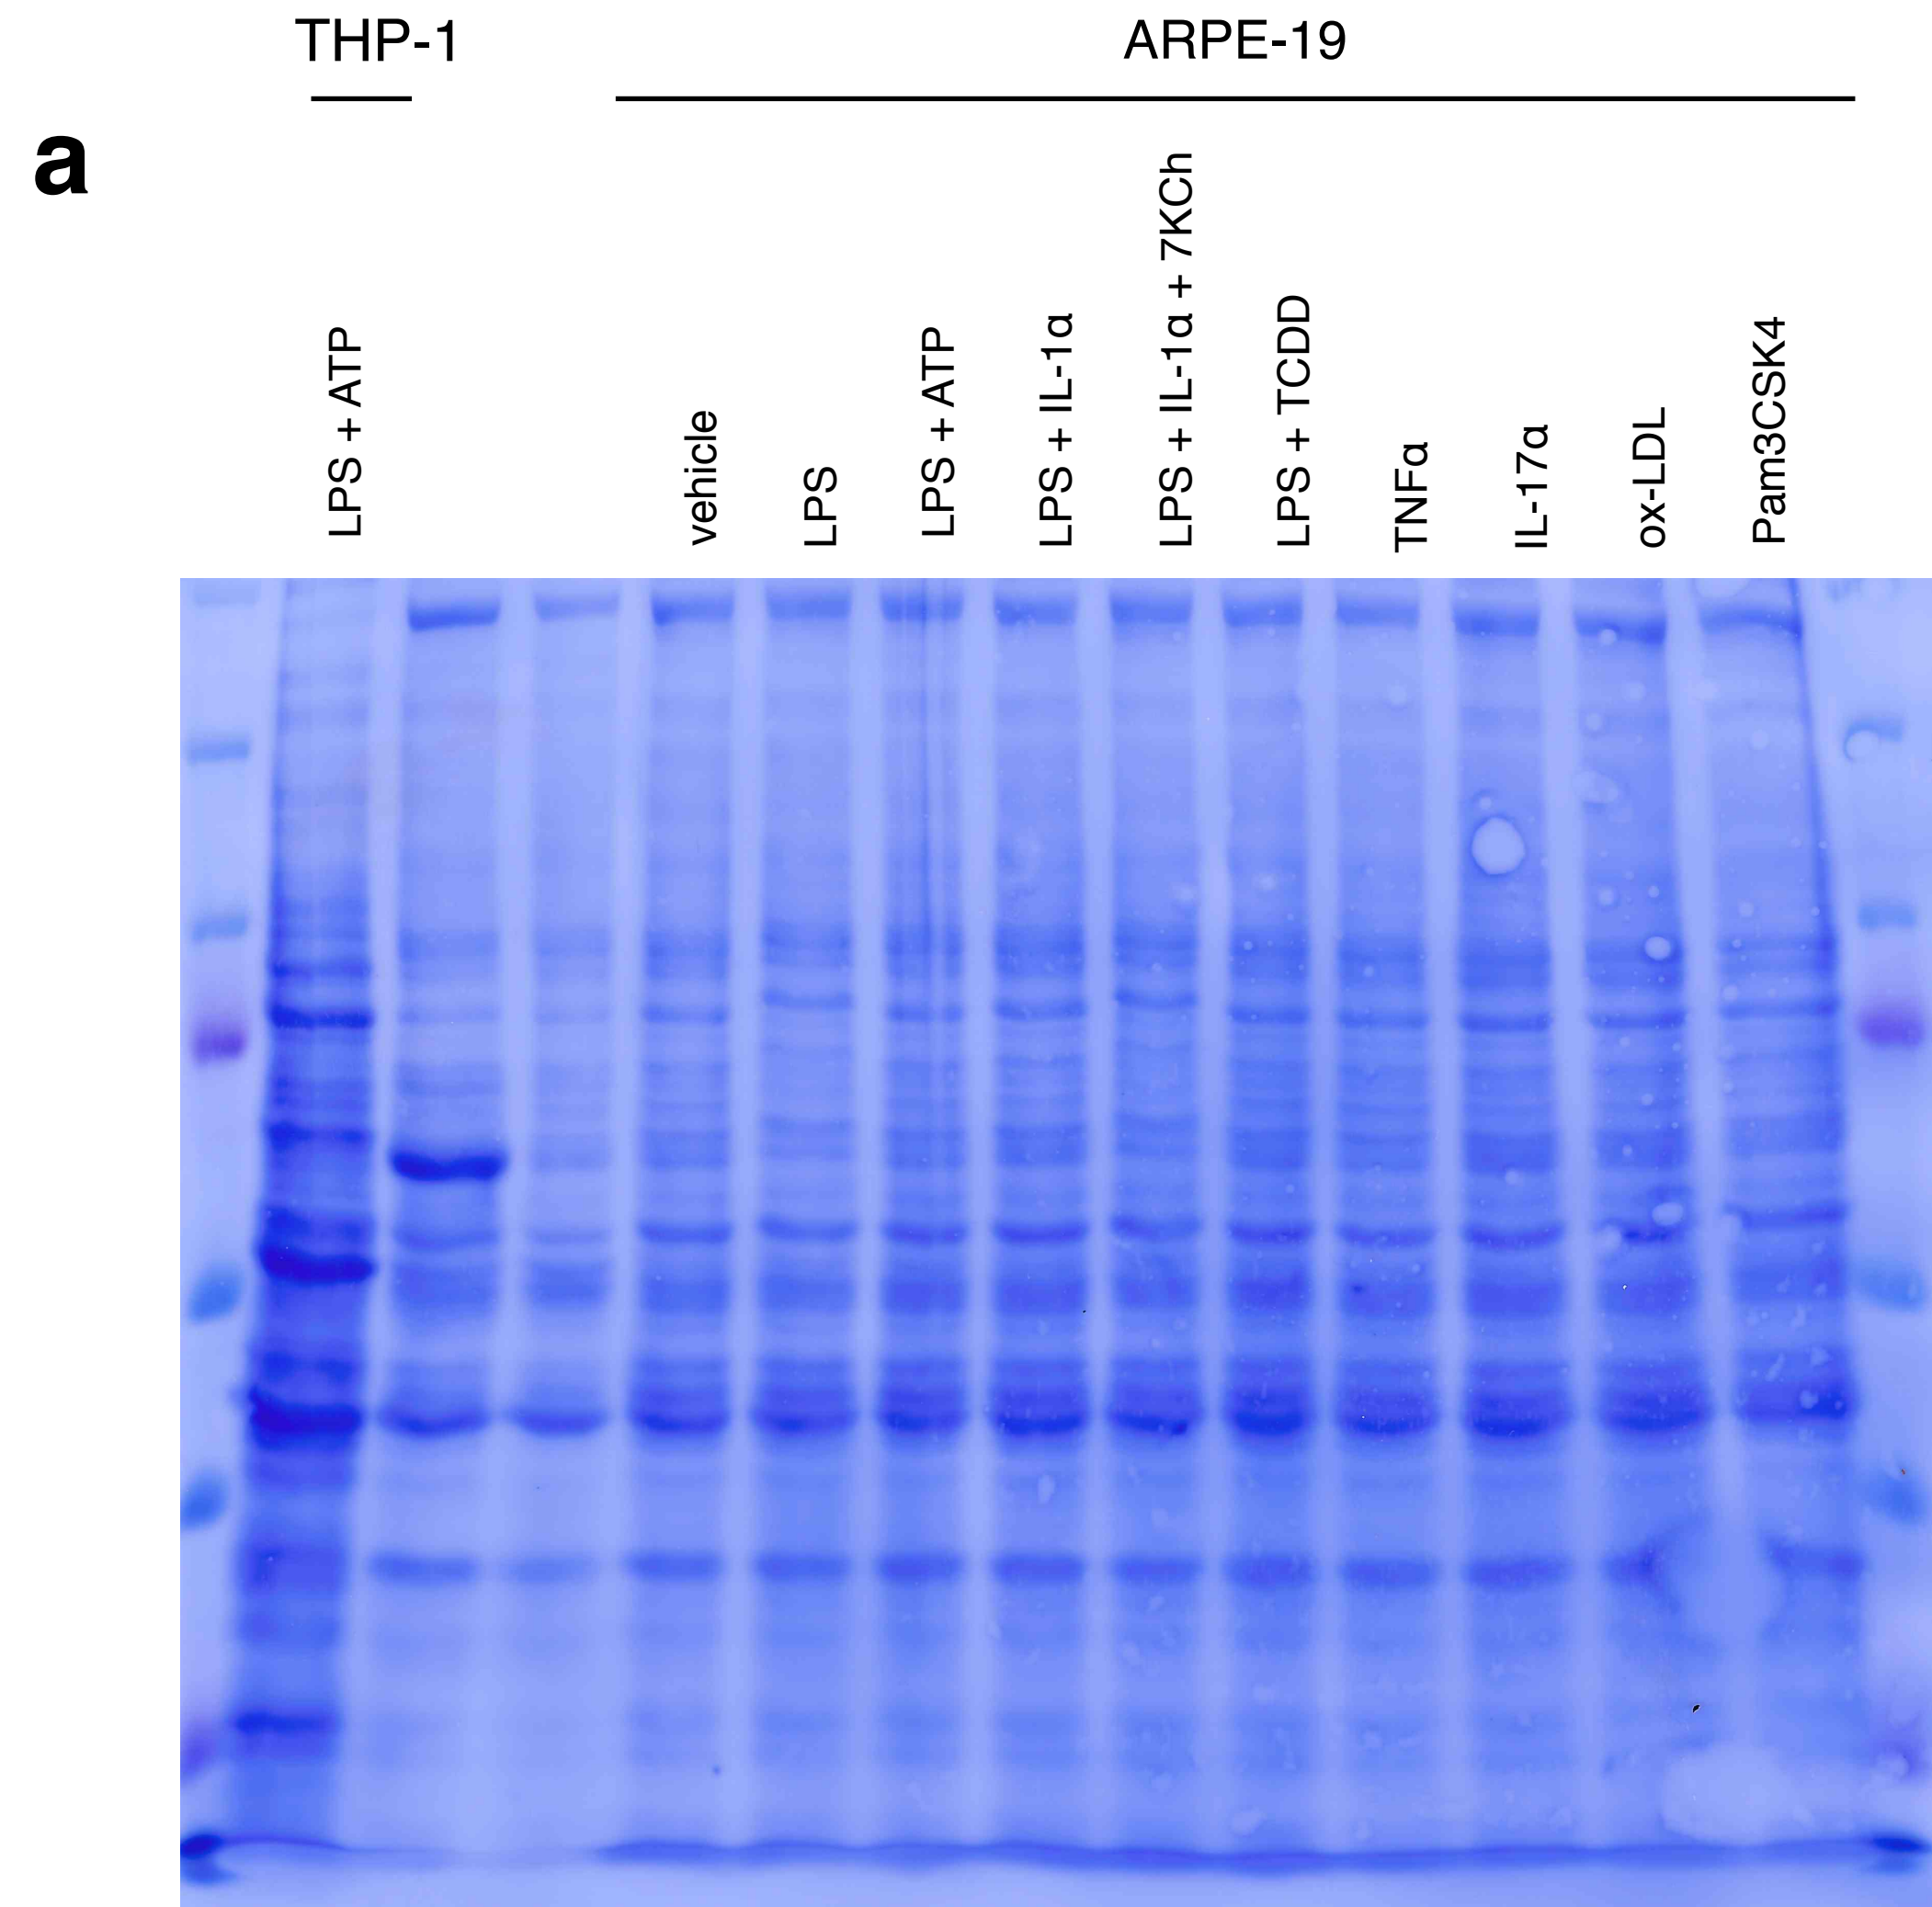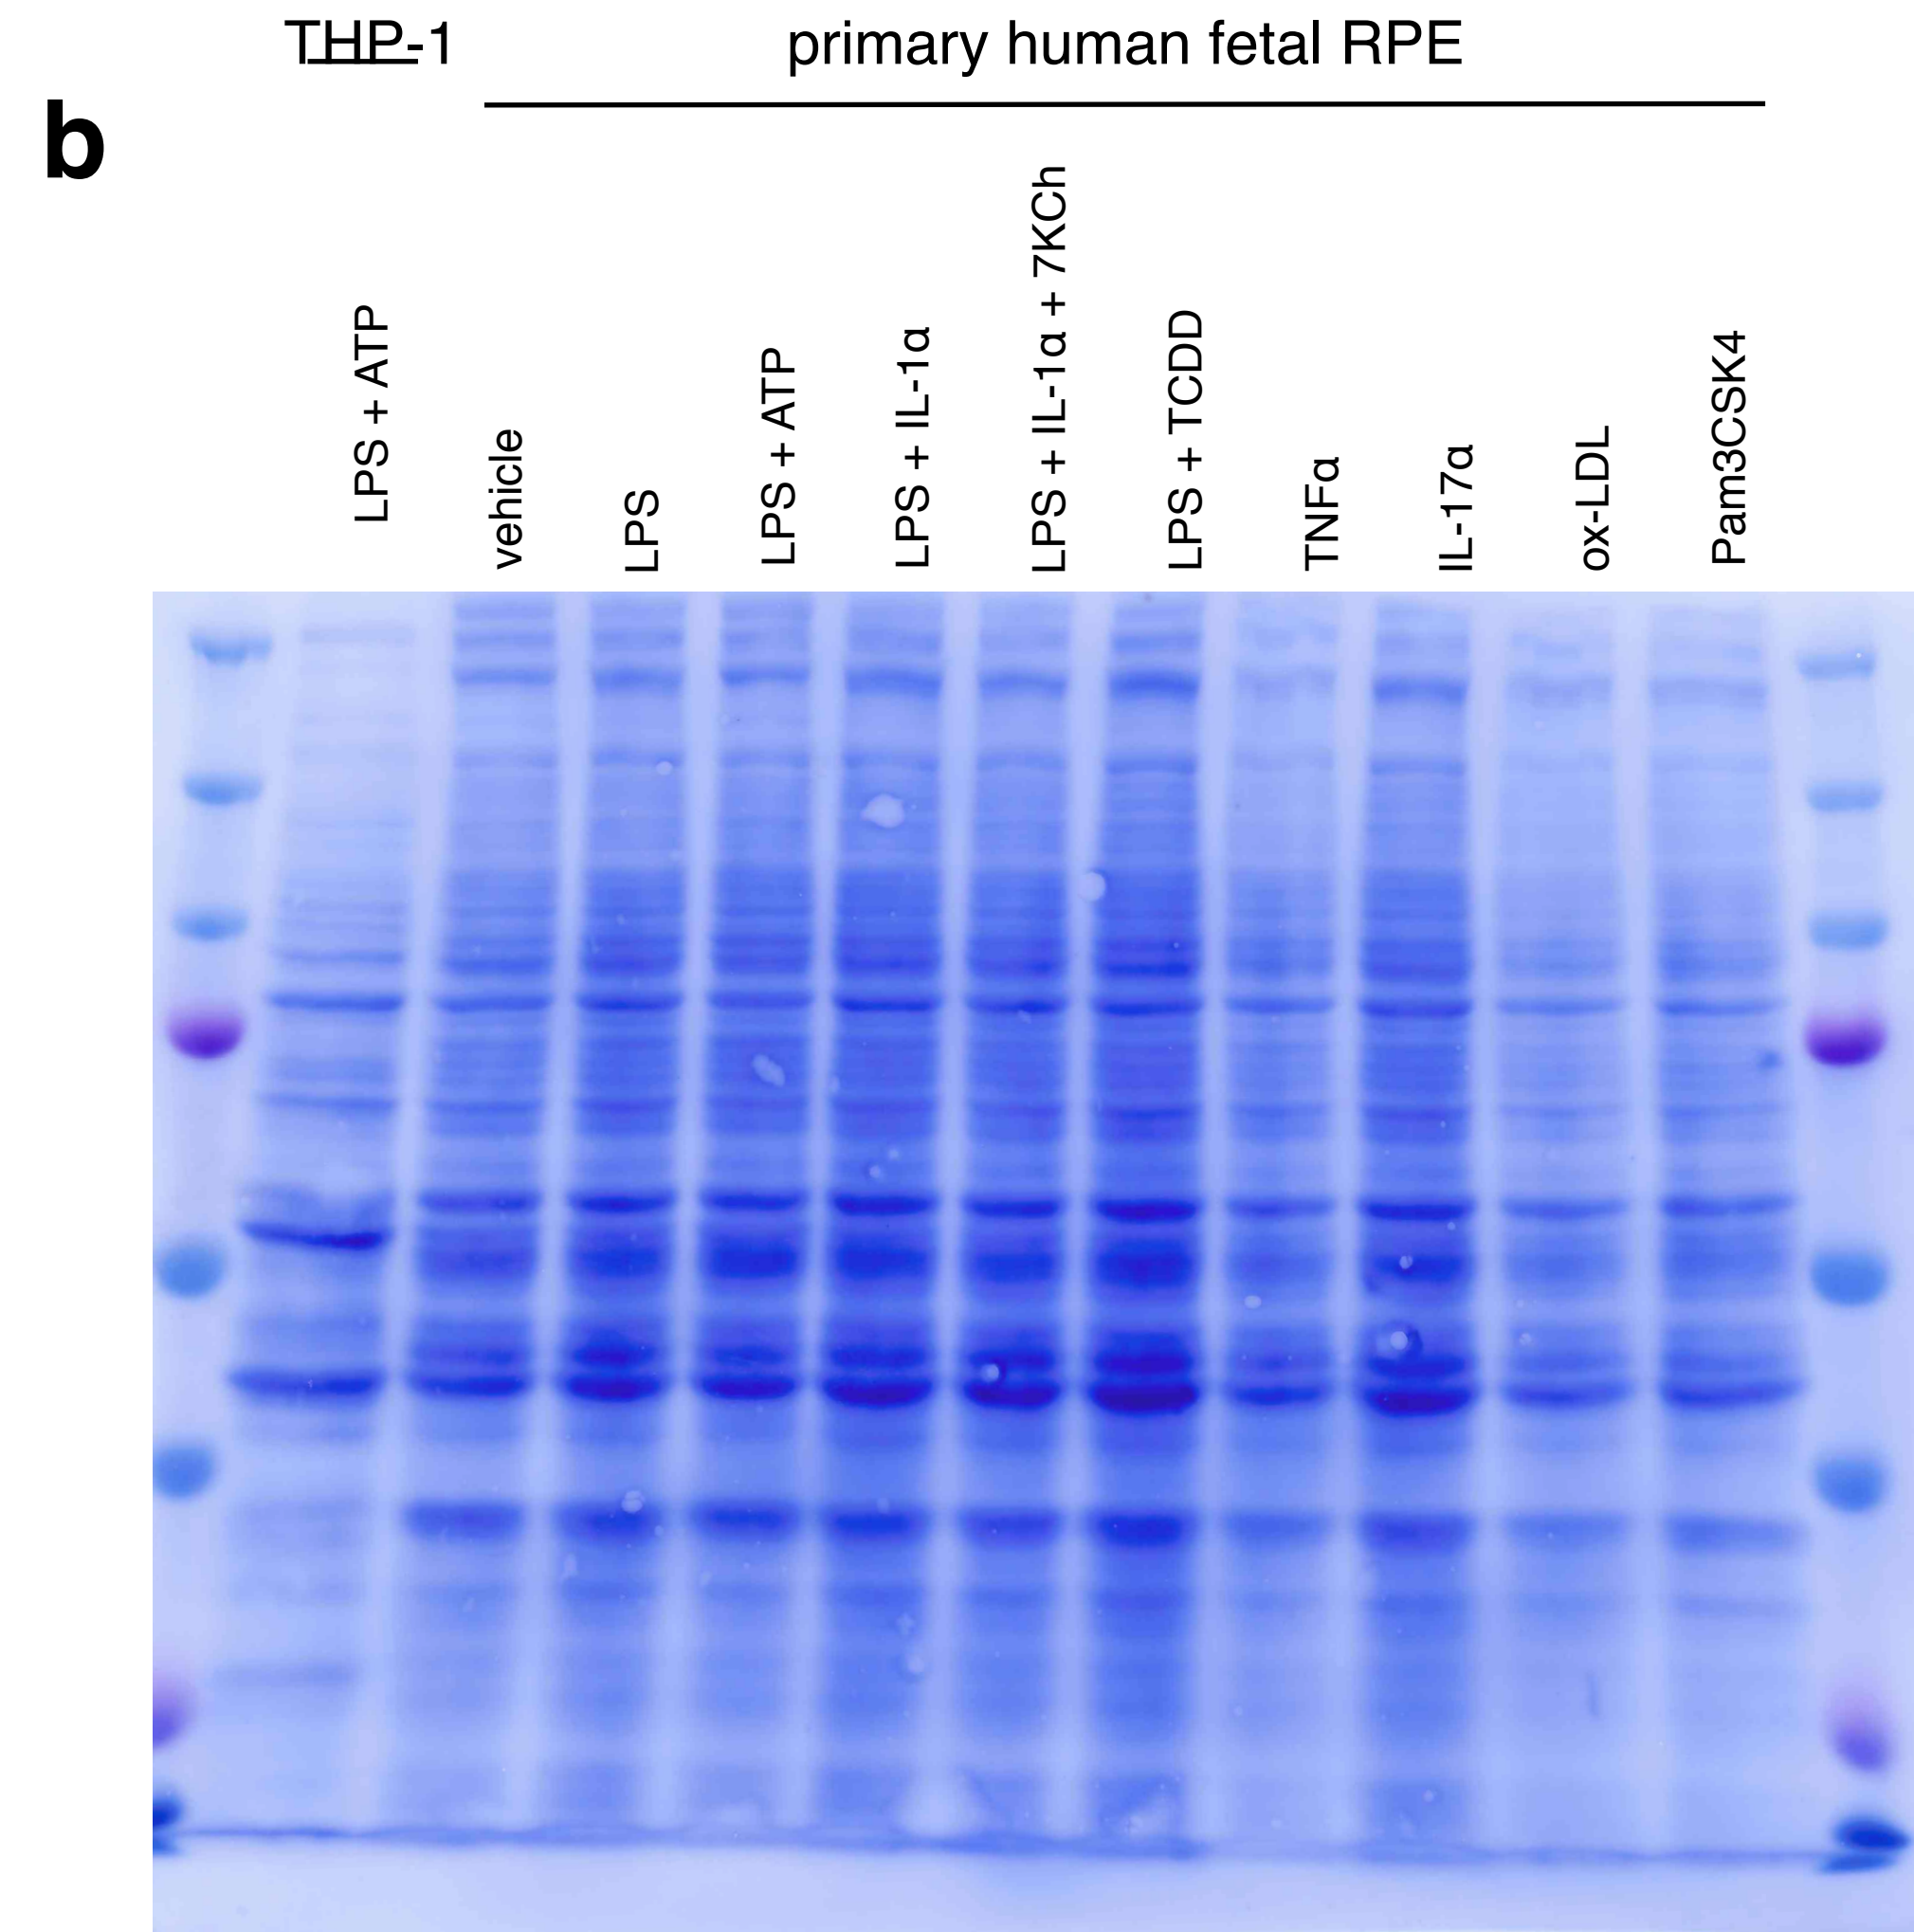

**Supplementary Figure S4:** Coomassie Blue staining of the same blots presented in Figures 3a, b, to determine equal protein loading between ARPE-19 or primary human fetal RPE samples on the same blot.

## Supplementary Figure S5: Coomassie Blue staining

**a**

| THP-1         |                  | ARPE-19 |                |  |
|---------------|------------------|---------|----------------|--|
| Cas 9 control | <i>DICER1</i> KO | VEH/    | Un-transfected |  |

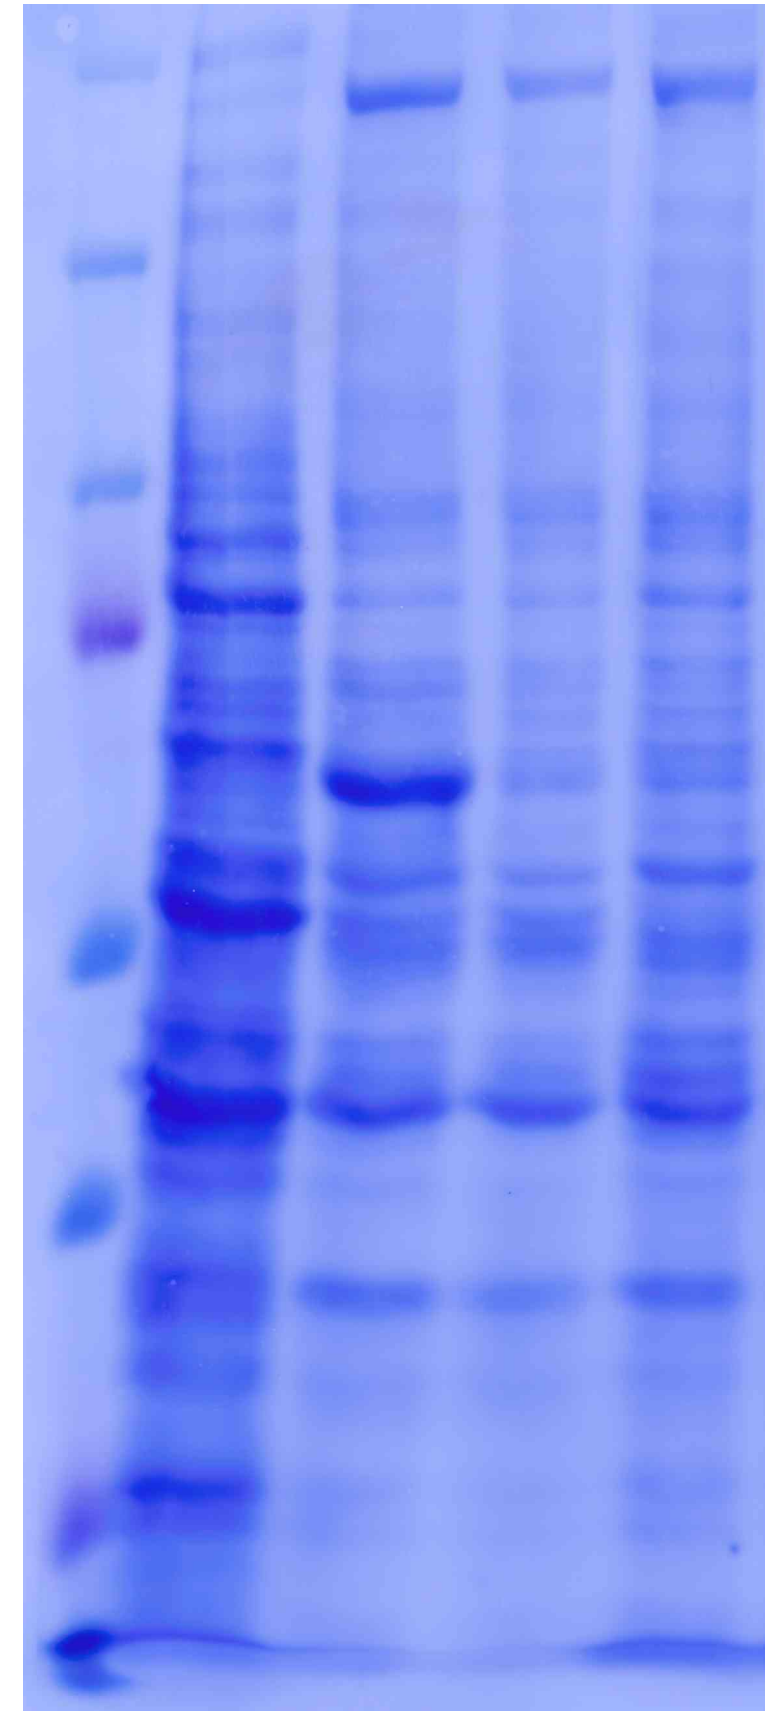

**b**

| THP-1     |           | primary human fetal RPE |        |                 |      |           |
|-----------|-----------|-------------------------|--------|-----------------|------|-----------|
|           |           | <i>DICER1</i>           |        | <i>Alu</i>      |      |           |
| 2 $\mu$ g | 5 $\mu$ g | Ctrl                    | DsiRNA | <i>dsAlu302</i> | Mock | LPS + ATP |

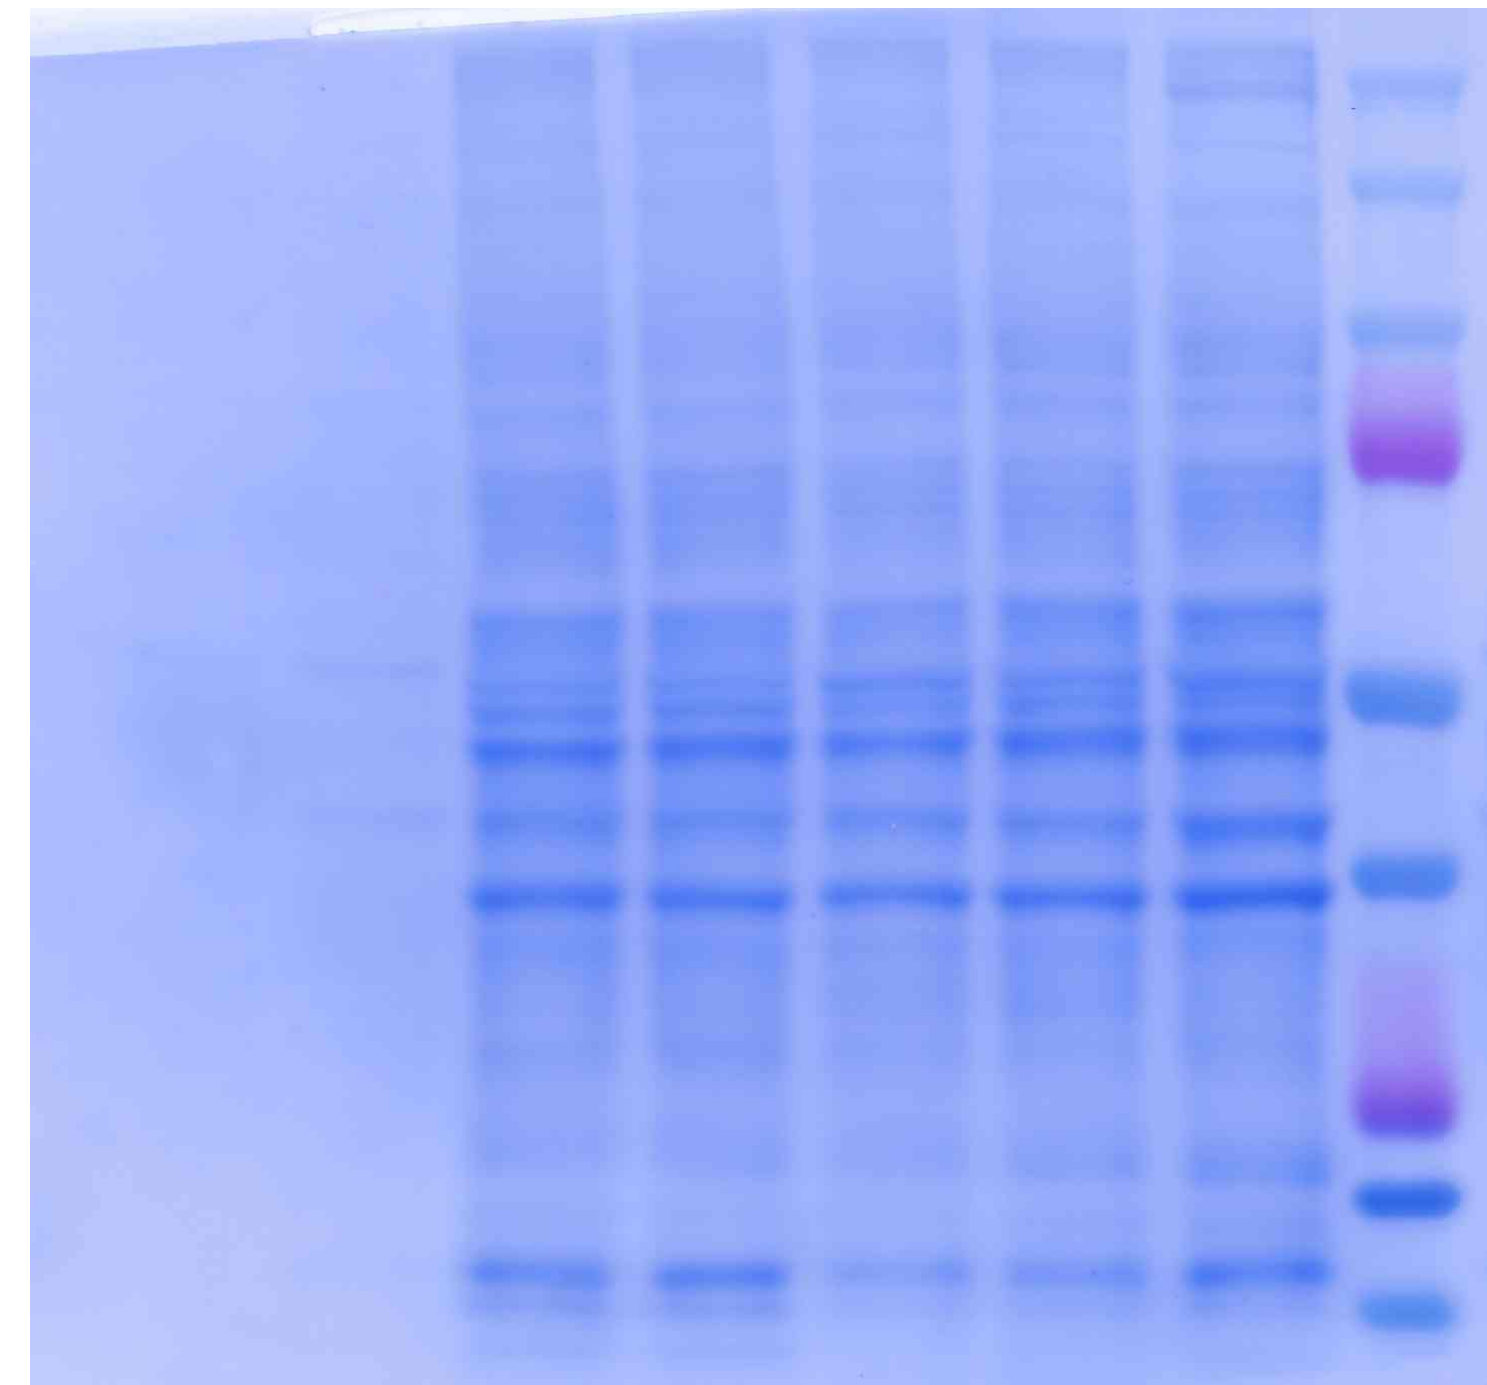

**Supplementary Figure S5:** Coomassie Blue staining of the same blots presented in Figure 4, to determine equal protein loading between samples on the same blot.

# Supplementary Figure S6: Coomassie Blue staining

**a**

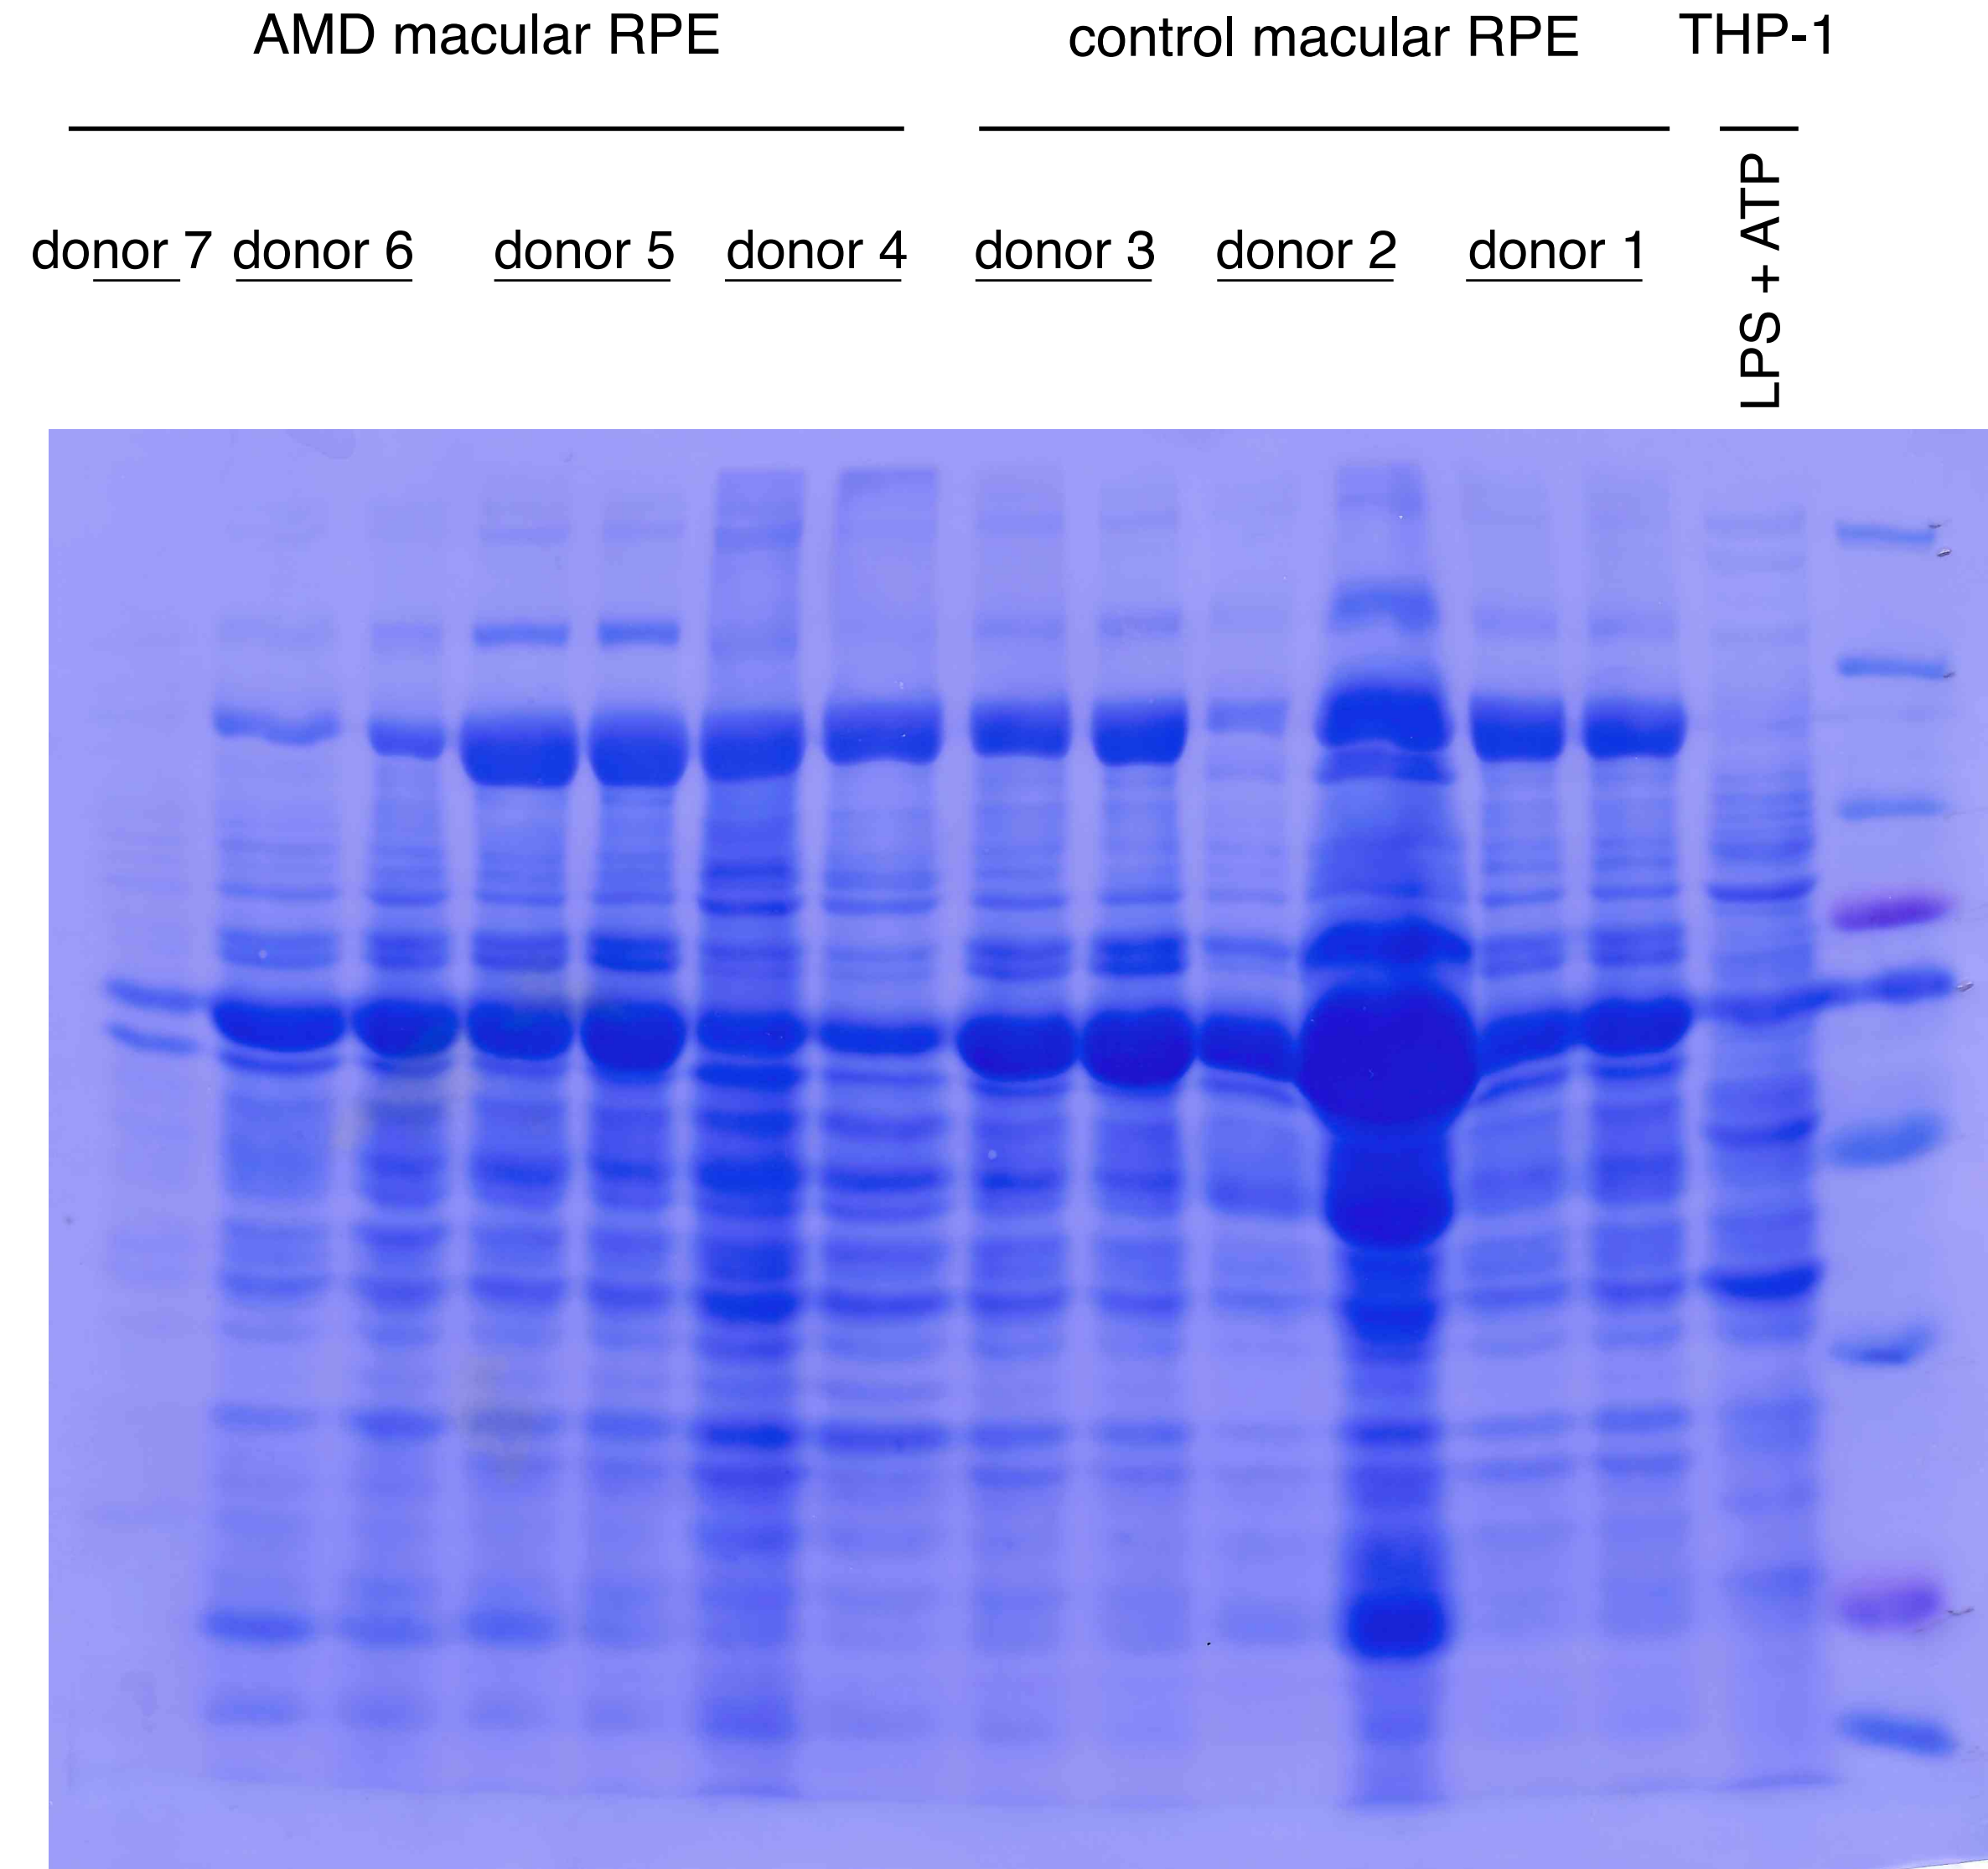

**b**

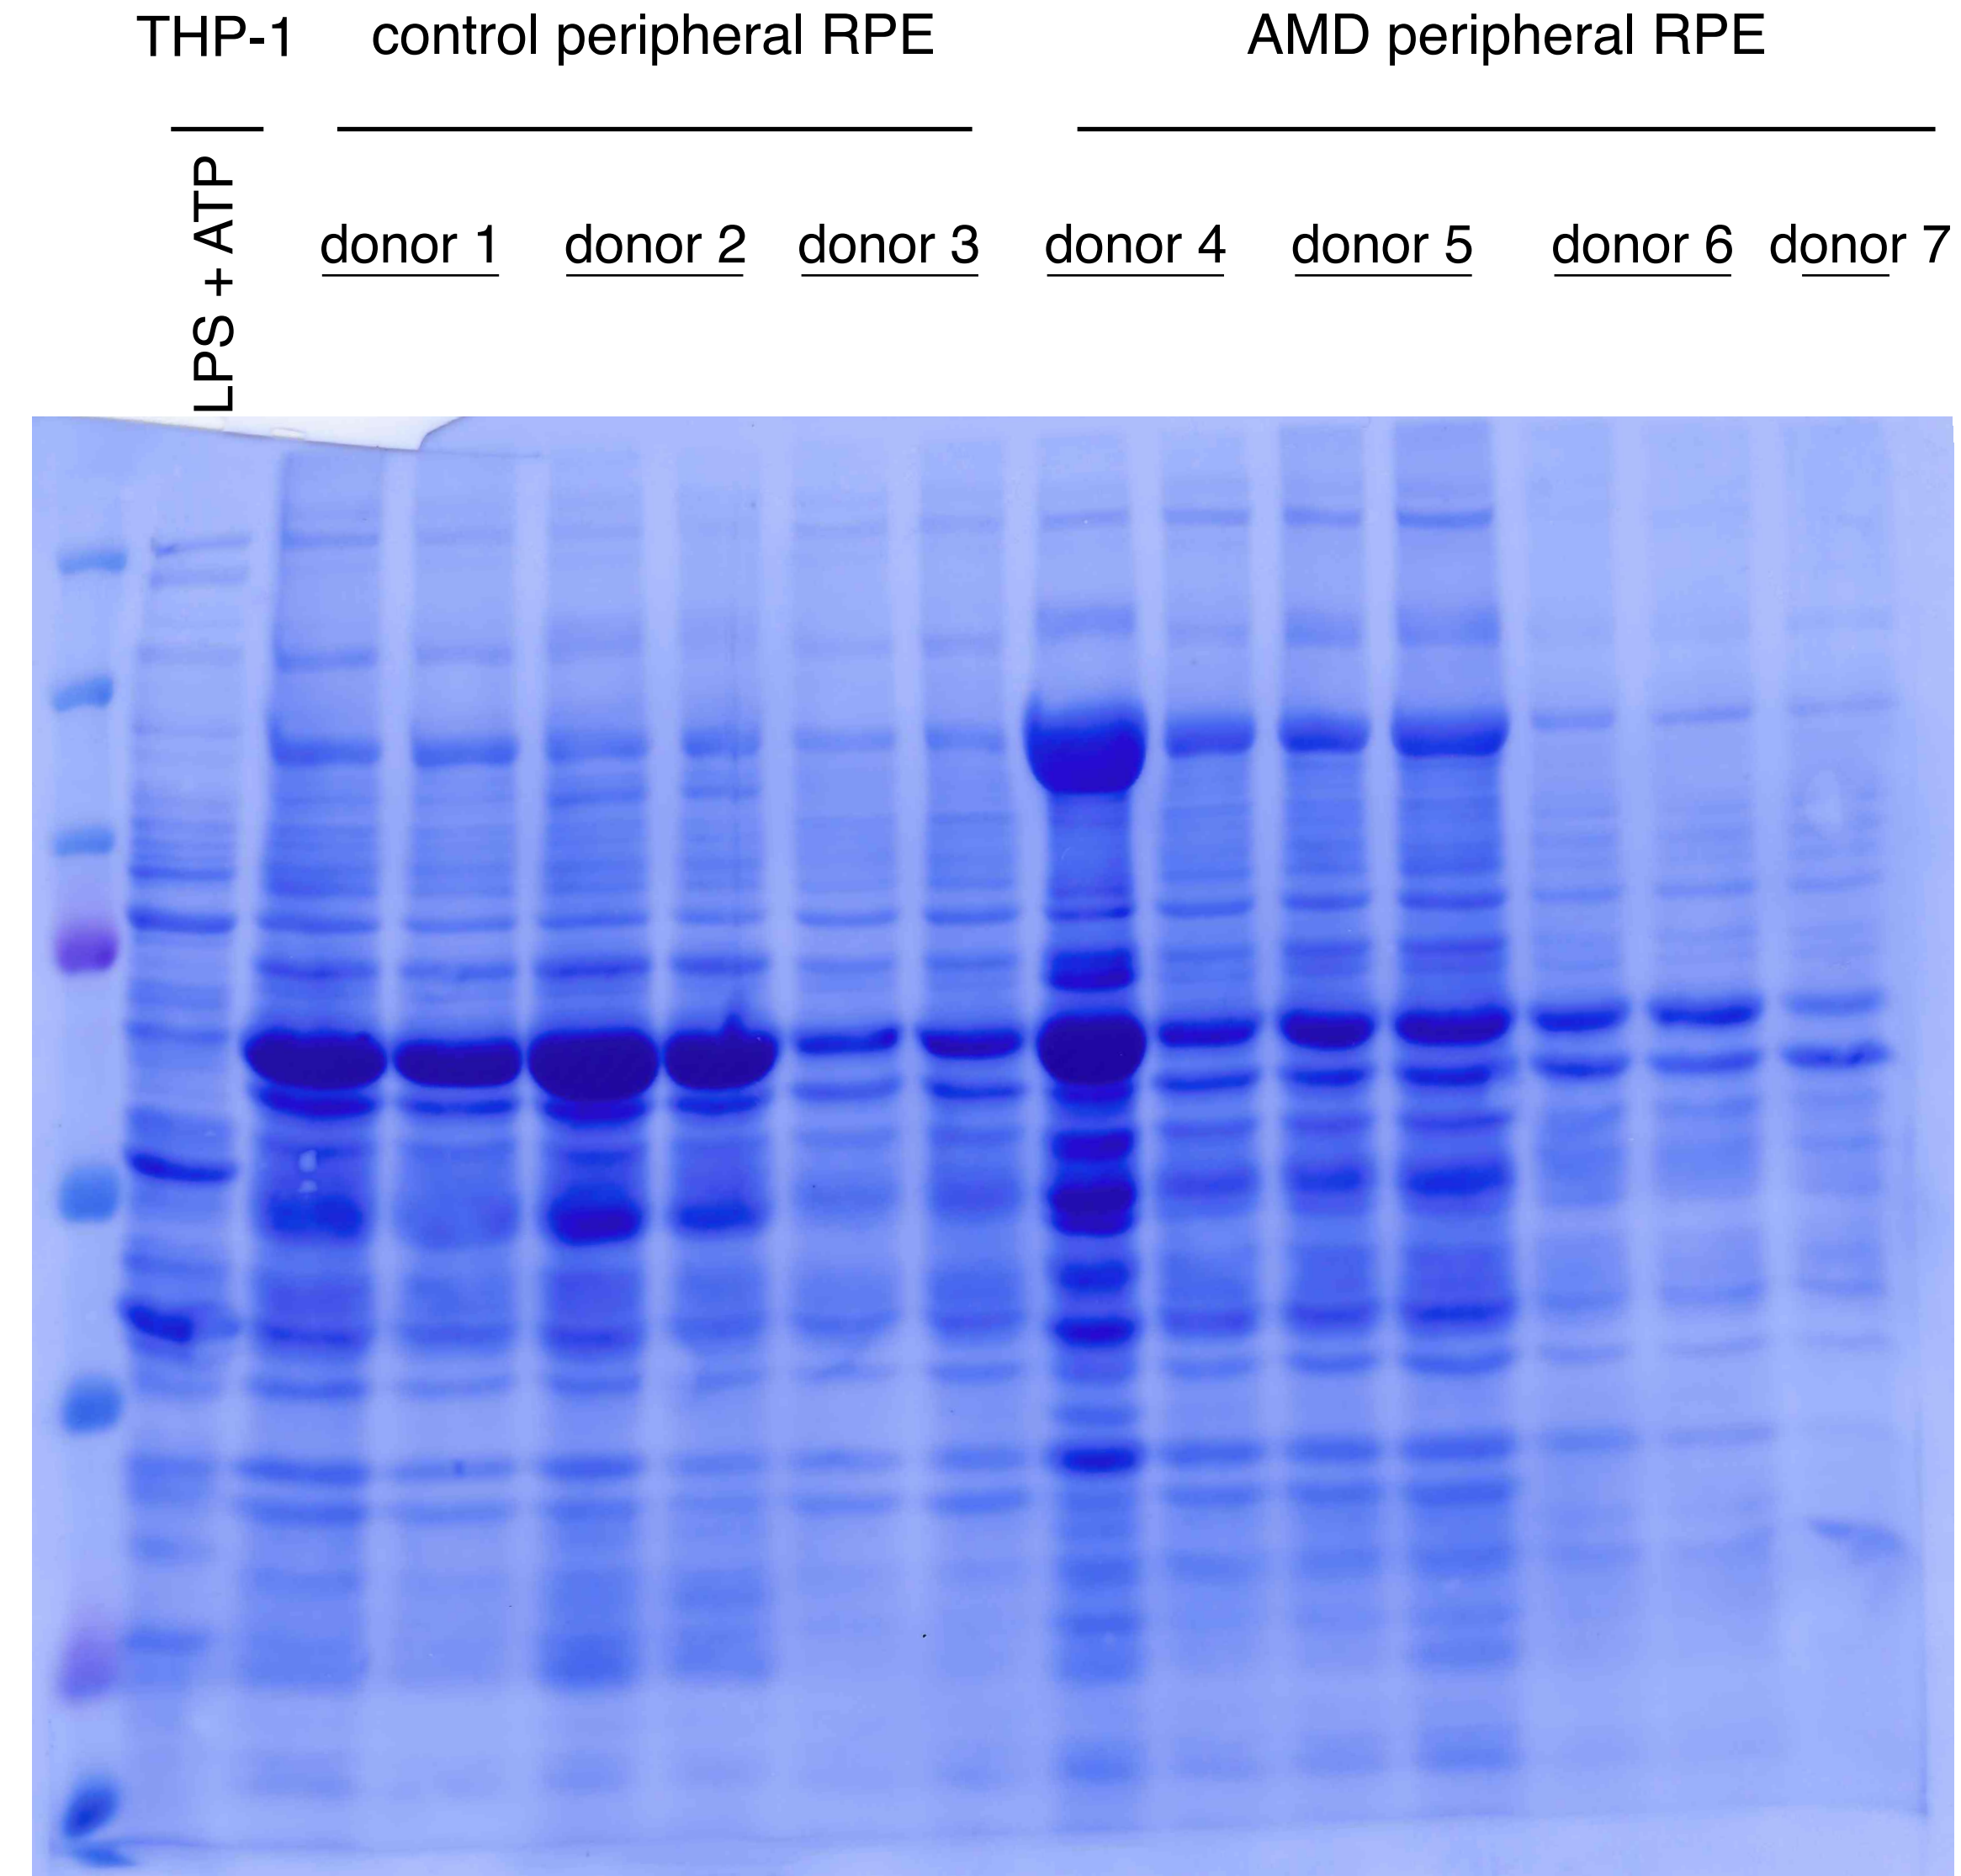

**Supplementary Figure S6:** Coomassie Blue staining of the same blots presented in Figure 5. To maximize our ability to detect NLRP3 signal we did not perform equal protein loading, which would have limited us to the most dilute sample. Instead maximum amount of protein from each sample was loaded.

# Supplementary Figure S7: NLRP3 expression in ARPE-19 and serial dilutions of THP-1

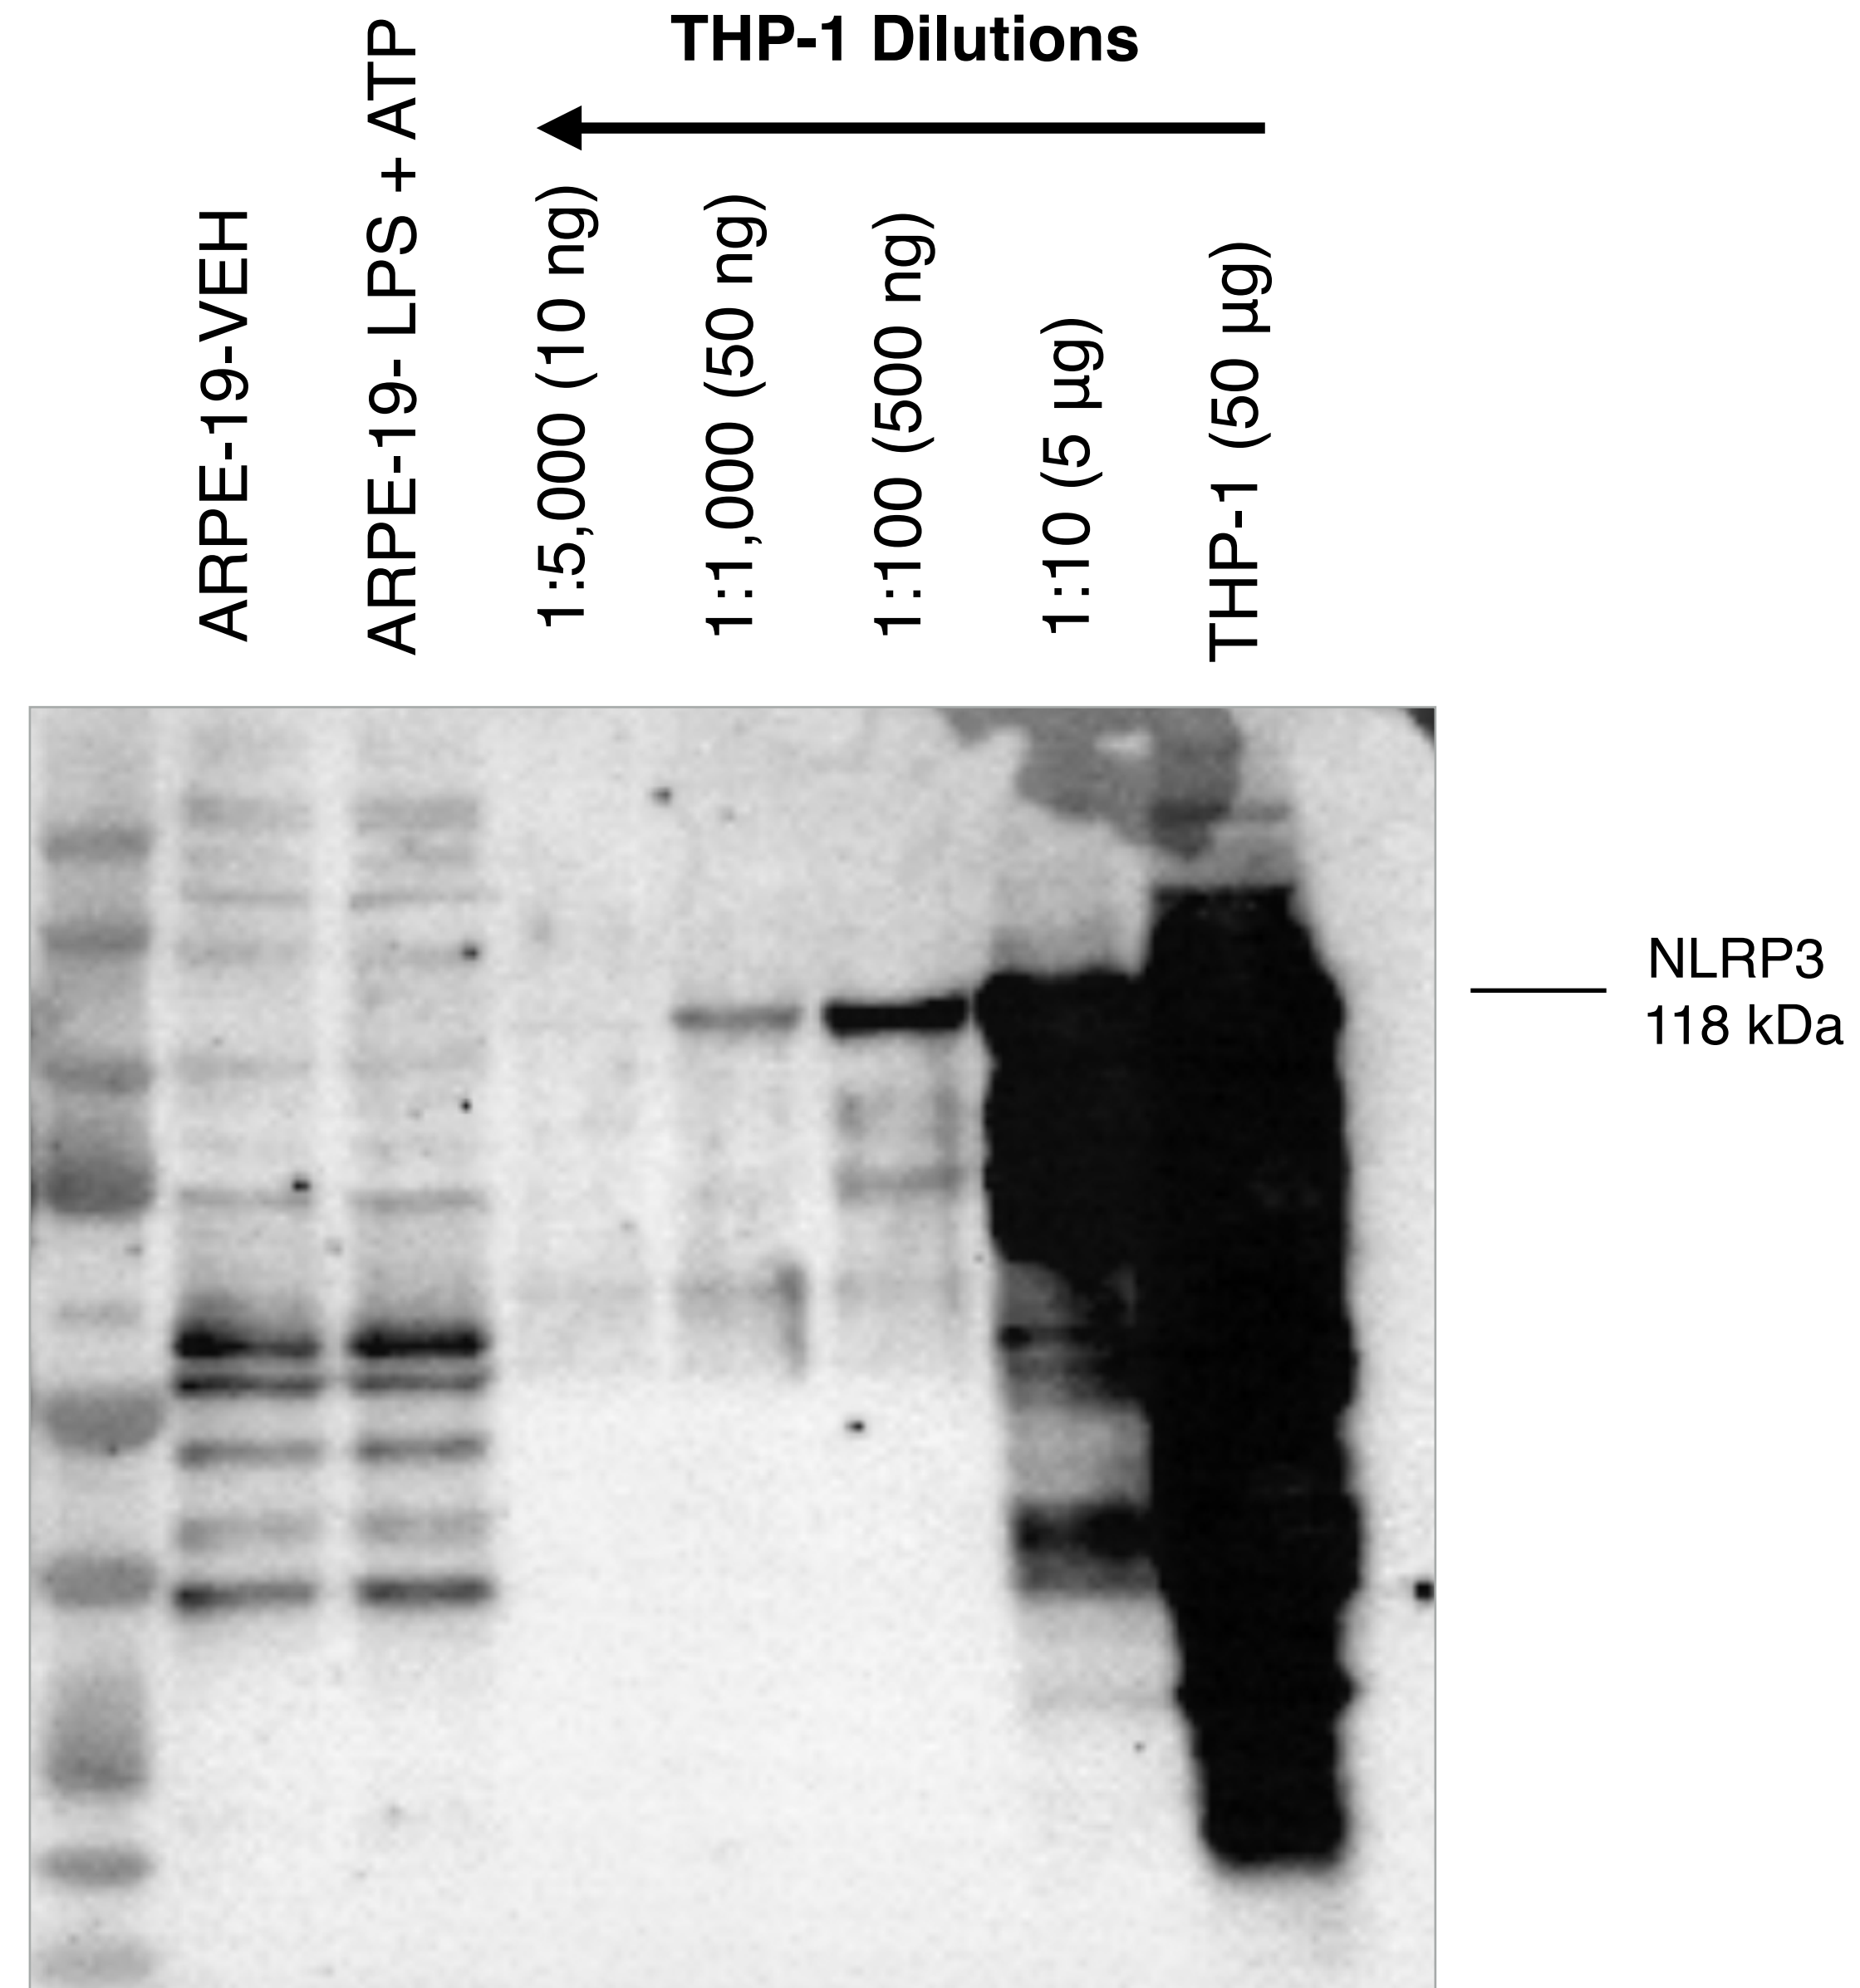

Supplementary Fig. S7 illustrates the whole blot presented at Figure 2a, at a 10-minute exposure time, since in Figure 2a the blot is cropped.



# Supplementary Figure S8: Protein sequencing analysis following THP-1 immunoprecipitation

## MASCOT SCIENCE Mascot Search Results

User : Sunia Trauger  
 Email : [strauger@fas.harvard.edu](mailto:strauger@fas.harvard.edu)  
 Search title : sample 1 re-run  
 MS data file : C:\Data\_MSConvert\Vavaas\sample1\_c.mgf  
 Database : Human 2013 (88479 sequences; 35079223 residues)  
 Timestamp : 3 Nov 2017 at 17:23:01 GMT  
 Enzyme : Trypsin  
 Fixed modifications : [Carbamidomethyl \(C\)](#)  
 Mass values : Monoisotopic  
 Protein Mass : Unrestricted  
 Peptide Mass Tolerance : ± 5 ppm  
 Fragment Mass Tolerance : ± 50 mmu  
 Max Missed Cleavages : 1  
 Instrument type : ESI-QUAD-TOF  
 Number of queries : 10766  
 Protein hits : [P04264](#) Keratin, type II cytoskeletal 1 OS=Homo sapiens GN=KRT1 PE=1 SV=6  
[Q96P20](#) NACHT, LRR and PYD domains-containing protein 3 OS=Homo sapiens GN=NLRP3 PE=1 SV=3  
[P01857](#) Ig gamma-1 chain C region OS=Homo sapiens GN=IGHG1 PE=1 SV=1  
[K7EQQ3](#) Keratin, type I cytoskeletal 9 OS=Homo sapiens GN=KRT9 PE=2 SV=1  
[Q00839](#) Heterogeneous nuclear ribonucleoprotein U OS=Homo sapiens GN=HNRNPU PE=1 SV=6

### Human [Decoy](#) False discovery rate

Peptide matches above identity threshold 6 0 0.00 %  
 Peptide matches above homology or identity threshold 11 0 0.00 %

### Select Summary Report

Format As [Select Summary \(protein hits\)](#) [Help](#)

Significance threshold p <  Max. number of hits  Show Percolator scores

Standard scoring  MudPIT scoring  Ions score or expect cut-off  Show sub-sets

Show pop-ups  Suppress pop-ups  Require bold red

Preferred taxonomy [All entries](#)

Re-Search  All queries  Unassigned  Below homology threshold  Below identity threshold

1. [P04264](#) Mass: 66170 Score: 158 Matches: 9(2) Sequences: 8(2) emPAI: 0.39  
 Keratin, type II cytoskeletal 1 OS=Homo sapiens GN=KRT1 PE=1 SV=6

| Query                 | Observed | Mr (expt) | Mr (calc) | ppm   | Miss | Score | Expect  | Rank | Unique | Peptide                                   |
|-----------------------|----------|-----------|-----------|-------|------|-------|---------|------|--------|-------------------------------------------|
| <a href="#">9111</a>  | 487.2677 | 972.5208  | 972.5240  | -3.21 | 0    | 8     | 3.6     | 1    | U      | K.IEISELNR.V                              |
| <a href="#">9325</a>  | 517.2619 | 1032.5093 | 1032.5087 | 0.55  | 0    | 14    | 0.52    | 1    | U      | R.TLLEGEESR.M                             |
| <a href="#">9684</a>  | 590.3015 | 1178.5885 | 1178.5931 | -3.95 | 0    | 45    | 0.00034 | 1    | U      | K.YEELQITAGR.H                            |
| <a href="#">9897</a>  | 633.3201 | 1264.6257 | 1264.6299 | -3.35 | 0    | 18    | 0.19    | 1    | U      | R.TNAENEFVTIK.K                           |
| <a href="#">9981</a>  | 650.7670 | 1299.5195 | 1299.5224 | -2.23 | 0    | 5     | 0.31    | 1    | U      | K.NMQDMVEDYR.N                            |
| <a href="#">9988</a>  | 651.8587 | 1301.7028 | 1301.7078 | -3.83 | 0    | 18    | 0.2     | 1    | U      | R.SLDLDSIIAEVK.A                          |
| <a href="#">10205</a> | 738.3761 | 1474.7376 | 1474.7416 | -2.69 | 0    | 14    | 0.38    | 1    | U      | K.WELLQQVDTSTR.T                          |
| <a href="#">10374</a> | 858.9276 | 1715.8406 | 1715.8438 | -1.88 | 0    | 36    | 0.003   | 1    | U      | K.QISNLQQSISDAEQR.G <a href="#">10376</a> |

#### Proteins matching a subset of these peptides:

[P04259](#) Mass: 60315 Score: 45 Matches: 1(1) Sequences: 1(1)  
 Keratin, type II cytoskeletal 6B OS=Homo sapiens GN=KRT6B PE=1 SV=5  
[P35908](#) Mass: 65678 Score: 8 Matches: 1(0) Sequences: 1(0)  
 Keratin, type II cytoskeletal 2 epidermal OS=Homo sapiens GN=KRT2 PE=1 SV=2

2. [Q96P20](#) Mass: 120662 Score: 87 Matches: 11(0) Sequences: 11(0) emPAI: 0.09  
 NACHT, LRR and PYD domains-containing protein 3 OS=Homo sapiens GN=NLRP3 PE=1 SV=3

| Query                 | Observed | Mr (expt) | Mr (calc) | ppm   | Miss | Score | Expect | Rank | Unique | Peptide        |
|-----------------------|----------|-----------|-----------|-------|------|-------|--------|------|--------|----------------|
| <a href="#">8528</a>  | 439.7396 | 877.4646  | 877.4658  | -1.34 | 0    | 8     | 2      | 1    | U      | K.ADVSAFLR.M   |
| <a href="#">8936</a>  | 466.2638 | 930.5130  | 930.5134  | -0.46 | 0    | 1     | 15     | 1    | U      | R.EVSLVTQR.S   |
| <a href="#">8999</a>  | 473.2709 | 944.5272  | 944.5291  | -2.01 | 0    | 14    | 0.85   | 1    | U      | K.IEINLSTR.M   |
| <a href="#">9207</a>  | 500.7854 | 999.5562  | 999.5600  | -3.86 | 0    | 17    | 0.17   | 1    | U      | R.EQELLAIGK.T  |
| <a href="#">9796</a>  | 611.8311 | 1221.6476 | 1221.6506 | -2.49 | 0    | 13    | 0.37   | 1    | U      | R.FLFLVNVQER.T |
| <a href="#">10162</a> | 478.5590 | 1432.6552 | 1432.6598 | -3.17 | 0    | 9     | 0.8    | 1    | U      | R.FDYLFYIHR.E  |

## Supplementary Fig. S8 illustrates protein sequencing analysis data:

NLRP3 from stimulated THP-1 (LPS + ATP) cells was immunoprecipitated, run on gel electrophoresis and sequenced by mass spectrometry

|                       |           |           |           |       |   |   |      |   |   |                          |
|-----------------------|-----------|-----------|-----------|-------|---|---|------|---|---|--------------------------|
| <a href="#">10353</a> | 843.8808  | 1685.7471 | 1685.7541 | -4.16 | 0 | 7 | 0.64 | 1 | U | K.MMLDWASGTYQDR.F        |
| <a href="#">10433</a> | 923.9810  | 1845.9474 | 1845.9472 | 0.06  | 0 | 4 | 3.2  | 1 | U | K.LVELDLSDNALGDFGIR.L    |
| <a href="#">10488</a> | 972.0340  | 1942.0534 | 1942.0564 | -1.53 | 0 | 7 | 0.98 | 1 | U | K.TTAVYVFFLLSLLQPR.G     |
| <a href="#">10544</a> | 1004.5060 | 2006.9975 | 2006.9983 | -0.38 | 0 | 1 | 6.7  | 1 | U | R.LYVGENALGDSGVAILCEK.A  |
| <a href="#">10680</a> | 1216.6111 | 2431.2077 | 2431.2159 | -3.35 | 0 | 6 | 1.1  | 1 | U | K.SALETLQEKPELTVVFEPSW.- |

#### Proteins matching the same set of peptides:

[Q96P20-4](#) Mass: 114206 Score: 87 Matches: 11(0) Sequences: 11(0)  
 Isoform 4 of NACHT, LRR and PYD domains-containing protein 3 OS=Homo sapiens GN=NLRP3

#### Proteins matching a subset of these peptides:

[Q96P20-2](#) Mass: 107958 Score: 86 Matches: 10(0) Sequences: 10(0)  
 Isoform 1 of NACHT, LRR and PYD domains-containing protein 3 OS=Homo sapiens GN=NLRP3  
[Q96P20-5](#) Mass: 114414 Score: 86 Matches: 10(0) Sequences: 10(0)  
 Isoform 5 of NACHT, LRR and PYD domains-containing protein 3 OS=Homo sapiens GN=NLRP3  
[Q96P20-3](#) Mass: 84733 Score: 76 Matches: 8(0) Sequences: 8(0)  
 Isoform 3 of NACHT, LRR and PYD domains-containing protein 3 OS=Homo sapiens GN=NLRP3

3. [P01857](#) Mass: 36596 Score: 31 Matches: 2(1) Sequences: 2(1) emPAI: 0.10  
 Ig gamma-1 chain C region OS=Homo sapiens GN=IGHG1 PE=1 SV=1

| Query                | Observed | Mr (expt) | Mr (calc) | ppm   | Miss | Score | Expect | Rank | Unique | Peptide      |
|----------------------|----------|-----------|-----------|-------|------|-------|--------|------|--------|--------------|
| <a href="#">8218</a> | 418.2194 | 834.4243  | 834.4269  | -3.09 | 0    | 28    | 0.03   | 1    | U      | K.DTLMISR.T  |
| <a href="#">8243</a> | 419.7549 | 837.4953  | 837.4960  | -0.83 | 0    | 3     | 2.4    | 1    | U      | K.ALPAPIEK.T |

#### Proteins matching the same set of peptides:

[P01860](#) Mass: 42287 Score: 31 Matches: 2(1) Sequences: 2(1)  
 Ig gamma-3 chain C region OS=Homo sapiens GN=IGHG3 PE=1 SV=2

#### Proteins matching a subset of these peptides:

[P01859](#) Score: 28 Matches: 1(1) Sequences: 1(1)  
 Ig gamma-2 chain C region OS=Homo sapiens GN=IGHG2 PE=1 SV=2  
[P01861](#) Score: 28 Matches: 1(1) Sequences: 1(1)  
 Ig gamma-4 chain C region OS=Homo sapiens GN=IGHG4 PE=1 SV=1

4. [K7EQQ3](#) Mass: 39618 Score: 28 Matches: 1(1) Sequences: 1(1) emPAI: 0.09  
 Keratin, type I cytoskeletal 9 OS=Homo sapiens GN=KRT9 PE=2 SV=1

| Query                | Observed | Mr (expt) | Mr (calc) | ppm   | Miss | Score | Expect | Rank | Unique | Peptide         |
|----------------------|----------|-----------|-----------|-------|------|-------|--------|------|--------|-----------------|
| <a href="#">9631</a> | 579.2972 | 1156.5798 | 1156.5836 | -3.32 | 0    | 28    | 0.015  | 1    | U      | R.QGVDADINGLR.Q |

#### Proteins matching the same set of peptides:

[P35527](#) Mass: 62255 Score: 28 Matches: 1(1) Sequences: 1(1)  
 Keratin, type I cytoskeletal 9 OS=Homo sapiens GN=KRT9 PE=1 SV=3

5. [Q00839](#) Mass: 91269 Score: 27 Matches: 1(1) Sequences: 1(1) emPAI: 0.04  
 Heterogeneous nuclear ribonucleoprotein U OS=Homo sapiens GN=HNRNPU PE=1 SV=6

| Query                 | Observed | Mr (expt) | Mr (calc) | ppm   | Miss | Score | Expect | Rank | Unique | Peptide                |
|-----------------------|----------|-----------|-----------|-------|------|-------|--------|------|--------|------------------------|
| <a href="#">10373</a> | 857.9597 | 1713.9049 | 1713.9050 | -0.07 | 0    | 27    | 0.016  | 1    | U      | K.SSGFTSLFAVTVAPPGAR.Q |

#### Proteins matching the same set of peptides:

[Q00839-2](#) Mass: 89665 Score: 27 Matches: 1(1) Sequences: 1(1)  
 Isoform Short of Heterogeneous nuclear ribonucleoprotein U OS=Homo sapiens GN=HNRNPU

## Supplementary Table S1: Summary of immunological reagents used in the present study.

WB: Western Blot, IP: Immunoprecipitation

|                        | <b>Manufacturer</b>         | <b>Reactivity</b> | <b>Host</b> | <b>[antibody]</b> | <b>Catalogue #</b>   | <b>Lot #</b> |
|------------------------|-----------------------------|-------------------|-------------|-------------------|----------------------|--------------|
| <b>anti-NLRP3</b>      | Cell Signaling Technologies | mouse, human      | rabbit      | WB 1:1000         | D4D8T, 15101         | 3            |
|                        | ProSci                      | mouse, human      | rabbit      | WB 1:1000         | 5447                 | 6769-1204    |
|                        | Novus Biologicals           | mouse, human      | mouse       | WB 1:1000         | 8N8E9,<br>NBP2-03947 | -            |
|                        | Novus Biologicals           | mouse, human      | rabbit      | WB 1: 400         | NBP2-12446           | 080639650-14 |
|                        | abcam                       | human             | mouse       | WB 1:1000         | ab160971             | GR228391-15  |
|                        | R&D Systems                 | mouse             | rat         | WB 1: 250         | MAB7578              | -            |
|                        | abcam                       | human, mouse      | rabbit      | WB 1: 500         | ab91525              | GR62279-6    |
|                        | Enzo Life Sciences          | human             | mouse       | WB 1:100          | ALX-804-818-C100     | 11051424     |
|                        | Sigma                       | human             | rabbit      | WB 1:1000         | HPA012878            | D106015      |
| <b>anti-DICER1</b>     | Cell Signaling Technologies | human             | rabbit      | WB 1:1000         | 3363                 | -            |
| <b>anti-ds RNA</b>     | SCICIONS                    | 50 species        | mouse       | IF 1: 250         | 10010200             | J2-1611      |
| <b>anti-Rabbit IgG</b> | Sigma                       | rabbit            | mouse       | IP 0.2 ng/ml      | R2655                | -            |

**Supplementary Table S2:** guide RNA sequences for the establishment of *DICER1* knockout ARPE-19 cells

|                 | <b>Sequence</b>                   | <b>Score</b> | <b>Targeted exon</b> |
|-----------------|-----------------------------------|--------------|----------------------|
| <b>Guide #1</b> | 5'- CACCGCATGTGGAATCGCTTATATC-3'  | 89%          | 1                    |
| <b>Guide #2</b> | 5'- CACCGCTTCCATCTGTTTGTTGCG -3'  | 82%          | 2                    |
| <b>Guide #3</b> | 5'- CACCGTACTGATATAAGCCAGCTC - 3' | 75%          | 2                    |
